RESEARCH ARTICLE

# Collaborative Cross mice have diverse phenotypic responses to infection with Methicillin-resistant *Staphylococcus aureus* USA300

Aravindh Nagarajan<sup>1,2</sup>, Kristin Scoggin<sup>1,3</sup>, Jyotsana Gupta<sup>2</sup>, Manuchehr Aminian<sup>4,5</sup>, L. Garry Adams<sup>6</sup>, Michael Kirby<sup>4</sup>, David Threadgill<sup>1,3,7,8</sup>, Helene Andrews-Polymenis<sup>1,2\*</sup>

**1** Interdisciplinary Program in Genetics and Genomics, Texas A&M University, College Station, Texas, United States of America, **2** Department of Microbial Pathogenesis and Immunology, Texas A&M University, College Station, Texas, United States of America, **3** Department of Molecular and Cellular Medicine, Texas A&M University, College Station, Texas, United States of America, **4** Department of Mathematics, Colorado State University, Fort Collins, Colorado, United States of America, **5** Department of Mathematics and Statistics, California State Polytechnic University, Pomona, California, United States of America, **6** Department of Veterinary Pathobiology, Texas A&M University, College Station, Texas, United States of America, **7** Texas A&M Institute for Genome Sciences and Society, Texas A&M University, College Station, Texas, United States of America, **8** Department of Biochemistry & Biophysics and Department of Nutrition, Texas A&M University, College Station, Texas, United States of America

\* [handrews@tamu.edu](mailto:handrews@tamu.edu)

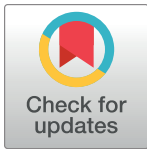

**OPEN ACCESS**

**Citation:** Nagarajan A, Scoggin K, Gupta J, Aminian M, Adams LG, Kirby M, et al. (2024) Collaborative Cross mice have diverse phenotypic responses to infection with Methicillin-resistant *Staphylococcus aureus* USA300. *PLoS Genet* 20(5): e1011229. <https://doi.org/10.1371/journal.pgen.1011229>

**Editor:** Gregory A. Cox, The Jackson Laboratory, UNITED STATES

**Received:** October 9, 2023

**Accepted:** March 18, 2024

**Published:** May 2, 2024

**Copyright:** © 2024 Nagarajan et al. This is an open access article distributed under the terms of the [Creative Commons Attribution License](https://creativecommons.org/licenses/by/4.0/), which permits unrestricted use, distribution, and reproduction in any medium, provided the original author and source are credited.

**Data Availability Statement:** All of the data points collected on each mouse before and after the infection can be found in the [supplementary file \(S2 Table\)](#). Raw RNA sequencing files can be found at the NCBI Sequence Read Archive (SRA) Accession number: PRJNA1002380, <https://www.ncbi.nlm.nih.gov/bioproject/PRJNA1002380>.

**Funding:** This work was funded by the Defense Advanced Research Project Agency, project D17AP00004 awarded to DWT, HAP, and MK (<https://www.darpa.mil/>). The funders played no

## Abstract

*Staphylococcus aureus* (*S. aureus*) is an opportunistic pathogen causing diseases ranging from mild skin infections to life threatening conditions, including endocarditis, pneumonia, and sepsis. To identify host genes modulating this host-pathogen interaction, we infected 25 Collaborative Cross (CC) mouse strains with methicillin-resistant *S. aureus* (MRSA) and monitored disease progression for seven days using a surgically implanted telemetry system. CC strains varied widely in their response to intravenous MRSA infection. We identified eight ‘susceptible’ CC strains with high bacterial load, tissue damage, and reduced survival. Among the surviving strains, six with minimal colonization were classified as ‘resistant’, while the remaining six tolerated higher organ colonization (‘tolerant’). The kidney was the most heavily colonized organ, but liver, spleen and lung colonization were better correlated with reduced survival. Resistant strains had higher pre-infection circulating neutrophils and lower post-infection tissue damage compared to susceptible and tolerant strains. We identified four CC strains with sexual dimorphism: all females survived the study period while all males met our euthanasia criteria earlier. In these CC strains, males had more baseline circulating monocytes and red blood cells. We identified several CC strains that may be useful as new models for endocarditis, myocarditis, pneumonia, and resistance to MRSA infection. Quantitative Trait Locus (QTL) analysis identified two significant loci, on Chromosomes 18 and 3, involved in early susceptibility and late survival after infection. We prioritized *Npc1* and *Ifi44l* genes as the strongest candidates influencing survival using variant analysis and mRNA expression data from kidneys within these intervals.

role in study design, data collection and analysis, decision to publish, or preparation of the manuscript.

**Competing interests:** The authors have declared that no competing interests exist.

## Author summary

Methicillin-resistant *Staphylococcus aureus* is a human opportunistic pathogen that can cause life-threatening diseases. To study the influence of host genetics on the outcome of MRSA infection, we infected a collection of genetically diverse mice. We identified different phenotypes for survival, organ colonization, and tissue damage, and classified CC strains into MRSA susceptible, tolerant, and resistant categories. We identified several parameters that correlated with these phenotypes. Four CC strains exhibited strong sexual dimorphism in infection outcome: females lived longer, and males had higher baseline circulating monocytes and red blood cells. Several of the CC strains we characterize may represent better animal models for diseases caused by MRSA. QTL analysis identified two genes, *Npc1* and *Ifi44l*, as strong candidates for involvement in early susceptibility and late survival after MRSA infection. Our data suggests a strong involvement of host genetics in MRSA infection outcome.

## Introduction

*Staphylococcus aureus*, a gram-positive organism, is a commensal and opportunistic pathogen that can cause severe morbidity and mortality [1,2]. This organism colonizes 20–30% of humans permanently and another 50–60% intermittently [3,4]. *S. aureus* colonization is a risk factor for subsequent infections ranging from mild skin and soft tissue infections to serious invasive infections and death [5–7]. *S. aureus* is a multi-host pathogen that can colonize and cause disease in cows, chickens, pigs, sheep, and wild animals [8]. Methicillin-resistant *S. aureus* is resistant to  $\beta$ -lactam antibiotics [9], and was primarily associated with hospital-acquired infections until the 1980s [10,11]. In the 1990s, MRSA spread rapidly in the community and is now considered a global threat [12]. MRSA causes more than 300,000 hospitalizations and 10,000 deaths in the US annually, at an estimated cost of 1.7 billion dollars (CDC, 2018).

USA300 is a highly successful community-acquired clone of MRSA. First reported in 1999, by 2011 USA300 became the primary cause of severe skin and soft-tissue infections, bacteremia, and community-onset pneumonia [13]. The increased disease burden caused by MRSA USA300 is attributed to the presence of multiple mobile genetic elements (MGEs) carrying virulence factors. In humans, USA300 infections are associated with increased mortality and increased incidence of severe sepsis than hospital-acquired MRSA infections [14, 15]. The differences in colonization rates, diversity in disease progression and mortality, exhibited by *S. aureus* suggests the involvement of host genetics.

Studies investigating the pathogenesis of *S. aureus* have relied heavily on a limited number of inbred mouse strains [16,17]. *S. aureus* infections in mice induce a diverse spectrum of diseases similar to what is observed in humans [17]. Intravenous infection in mice with *S. aureus* is commonly used as a model for sepsis with this pathogen [17–20]. Following intravenous inoculation with up to  $10^7$  organisms, *S. aureus* Newman (a methicillin-sensitive strain) eventually disseminates into various tissues, leading to the formation of abscesses in the vasculature, lung, heart, liver, spleen, and kidney [21]. It can take up to a month for these accumulating lesions to cause death in mice [21]. At higher doses ( $5 \times 10^7$ – $5 \times 10^8$  CFU), mice develop septic shock within 12–48 hours leading to death [22]. Infection with MRSA USA300 in mice follows a similar pattern of organ colonization [23].

Very little is known about the host genes and sex differences that influence *S. aureus* infections in mice. Targeted deletion of MyD88 (myeloid differentiation primary response protein, C57Bl6 x 129S1 intercross) and NOD2 (nucleotide-binding oligomerization domain-containing protein 2) render mice highly susceptible to *S. aureus* infection [24,25]. Outcomes after infection with *S. aureus* differ depending on the strain of laboratory mice used. In a bacteremia model, C57BL/6J mice are the most resistant in controlling bacterial growth and survive, while A/J, DBA/2, and BALB/c mice are very susceptible [26]. This information has been used to map a limited number of loci involved in this differential outcome. Using C57BL/6J and A/J Chromosomal substitution strains (CSS), six genes on three different chromosomes (Chr 11 – *Dusp3*, *Psme3*; Chr 8 – *Crif1*, *Cd97*; Chr 18 – *Tnfaip8*, *Seh1l*) have been implicated to susceptibility after infection with *S. aureus* (sanger 476) strain [27–29]. To our knowledge, no study has looked at the host factors involved in USA300 pathogenesis, a hypervirulent isolate compared to other strains [30–32]. Furthermore, no screen for MRSA infection disease outcomes has been performed across a broad range of host genetics.

Collaborative Cross mice have been successfully used to create disease models and identify susceptibility genes for various infections [33]. The CC is a large panel of recombinant inbred mouse strains created by interbreeding five classical inbred strains (A/J, C57BL/6J, 129S1/SvImJ, NOD/ShiLtJ, NZO/HILtJ) and three wild-derived inbred strains (CAST/EiJ, PWK/PhJ, and WSB/EiJ) using a funnel-breeding scheme [34,35]. CC strains have more than 30 million Single Nucleotide Polymorphisms (SNPs), and their genomes are fully sequenced, making them an ideal population for QTL mapping [36,37]. The CC has been heavily used to identify susceptibility to viral pathogens, including Ebola virus [38], West Nile virus [39], Influenza A virus [40], Coronaviruses [41,42], Theiler's murine encephalomyelitis virus [43], Cytomegalovirus [44] and Rift Valley fever virus [45]. The CC has also been used to study infection with bacterial pathogens, including *Mycobacterium tuberculosis* [46,47], *Klebsiella pneumoniae* [48], *Pseudomonas aeruginosa* [49], *Borrelia recurrentis* [50], *Salmonella Typhimurium* [51,52] and *Salmonella Typhi* [53].

We were interested in how host genetics influences disease outcome after MRSA bacteremia. Therefore, we screened 25 CC strains for disease outcome phenotypes after intravenous infection with MRSA USA300. We chose a 7-day screening period and very sensitive telemetry monitoring of MRSA infected animals in an attempt to capture and identify range of disease phenotypes from highly susceptible to resistant. Using this model system, we identified a wide range of disease outcomes, potential new MRSA disease models, and genomic regions linked to survival using QTL mapping. In order to prioritize the genes within these intervals we used variant analysis and mRNA expression data from kidneys.

## Results

### CC strains have diverse disease outcomes after MRSA infection

We screened twenty-five Collaborative Cross strains (three males and three females per strain) for their phenotypes after intravenous infection with MRSA USA300 (S1 Table). Because blood borne infections can become rapidly fatal, we used a 7-day screening period to allow us to delineate sensitive and resistant CC lines. Animals were monitored for clinical symptoms using a continuously monitored telemetry system and a manual health scoring method up to one-week post-infection to identify those susceptible to MRSA infection. Telemetry data was used to create real-time circadian patterns for each animal in the study. At the time of necropsy spleen, liver, heart, lung, and kidney were collected to enumerate the bacterial load and tissue damage (S2 Table).

C57BL/6J mice, known to survive MRSA infection, served as controls [26]. All C57BL/6J mice survived until the end of the experiment (day 7) and were thus classified as a surviving strain (Fig 1A). CC strains varied widely in their response to MRSA sepsis (Figs 1 and S1). Median survival ranged from 2.5 to 7 days (Fig 1A). Median weight loss ranged from losing 20% of their body weight (CC002, CC037) to losing less than 1% (CC003, CC017, CC024) (Fig 1B). Out of the 156 infected mice, 10 mice belonging to 6 different strains appeared to clear MRSA from all organs we collected (Fig 1D). We included these mice in our analysis based on disturbances in circadian pattern following infection and histology scores, suggesting that they did become infected (S6 and S7 Figs).

CC strains that had four or more mice of the six infected meeting our euthanasia criteria before day seven were classified as 'susceptible'. Eight of the 25 CC strains we infected were classified in this category (CC002, CC006, CC027, CC037, CC036, CC053, CC057, CC061) (Fig 1A). Susceptible strains, on average, lost 16% of their body weight (Fig 1B). Two susceptible strains, CC027 and CC057, had median kidney colonization on the order of  $10^9$ , ~100-fold higher than the inoculation dose (Fig 1C).

Five CC strains had three mice that met our euthanasia criteria before day 7. Of these five strains, the survival of four of these strains was uniformly sexually dimorphic during our experimental time period: all the males met our euthanasia criteria early in the experimental period, while all females of these strains survived the full 7-day infection (CC013, CC015, CC043, CC058) (Fig 1). These four CC strains were classified as sexually dimorphic in their survival after MRSA infection. CC001, classified as 'surviving', may also display sexual dimorphism; 2/3 males met our euthanasia criteria prior to day 7, and the remaining male never recovered to a pre-infection circadian pattern of body temperature or activity. Infection experiments of longer duration will be required to determine if the sensitivity of males in this strain is uniform. Finally, although CC042 is highly susceptible to other bacterial pathogens [46,51,54], couldn't easily be classified with respect to MRSA infection outcome as two females and one male survived infection.

We classified the remaining 12 surviving CC strains into tolerant and resistant phenotypes. We defined tolerance as surviving the infection with a high bacterial burden while limiting the health impact caused by the pathogen [55–57]. Six strains with higher total organ colonization compared to the inoculum dose were classified as tolerant (CC001, CC005, CC019, CC024, CC038, CC051) (Fig 1D). These strains limited the impact to their health (based on circadian pattern and health scores) despite high colonization in several organs (S6 Fig and S2 Table). Although CC051 mice infected with MRSA survived and were classified here as tolerant, they exhibited some weight loss and a persistent disruption of their circadian pattern of body temperature and activity. Infections of longer duration will be needed to determine whether CC051 mice are truly tolerant or display a delayed susceptibility phenotype [52].

Surviving the infection by preventing colonization or clearing the pathogen was defined as resistance [55–57]. The remaining six strains, with lower (compared to the inoculum dose) or no colonization, were classified as resistant (CC003, CC012, CC017, CC023, CC025, CC041) (Fig 1D). MRSA infection had minimal impact on the health of these CC strains (S6 Fig and S2 Table). The wide range of disease severity, survival, weight loss, and organ colonization we observed during blood borne MRSA infection suggest diverse host responses across genetically different CC strains.

### Correlation of colonization, tissue damage and immune parameters with survival

Pre-infection weight did not influence survival ( $R = -0.05$ ), while weight loss after infection correlated with poor survival ( $R = -0.65$ ) (Fig 2A). Colonization in all five organs was highly

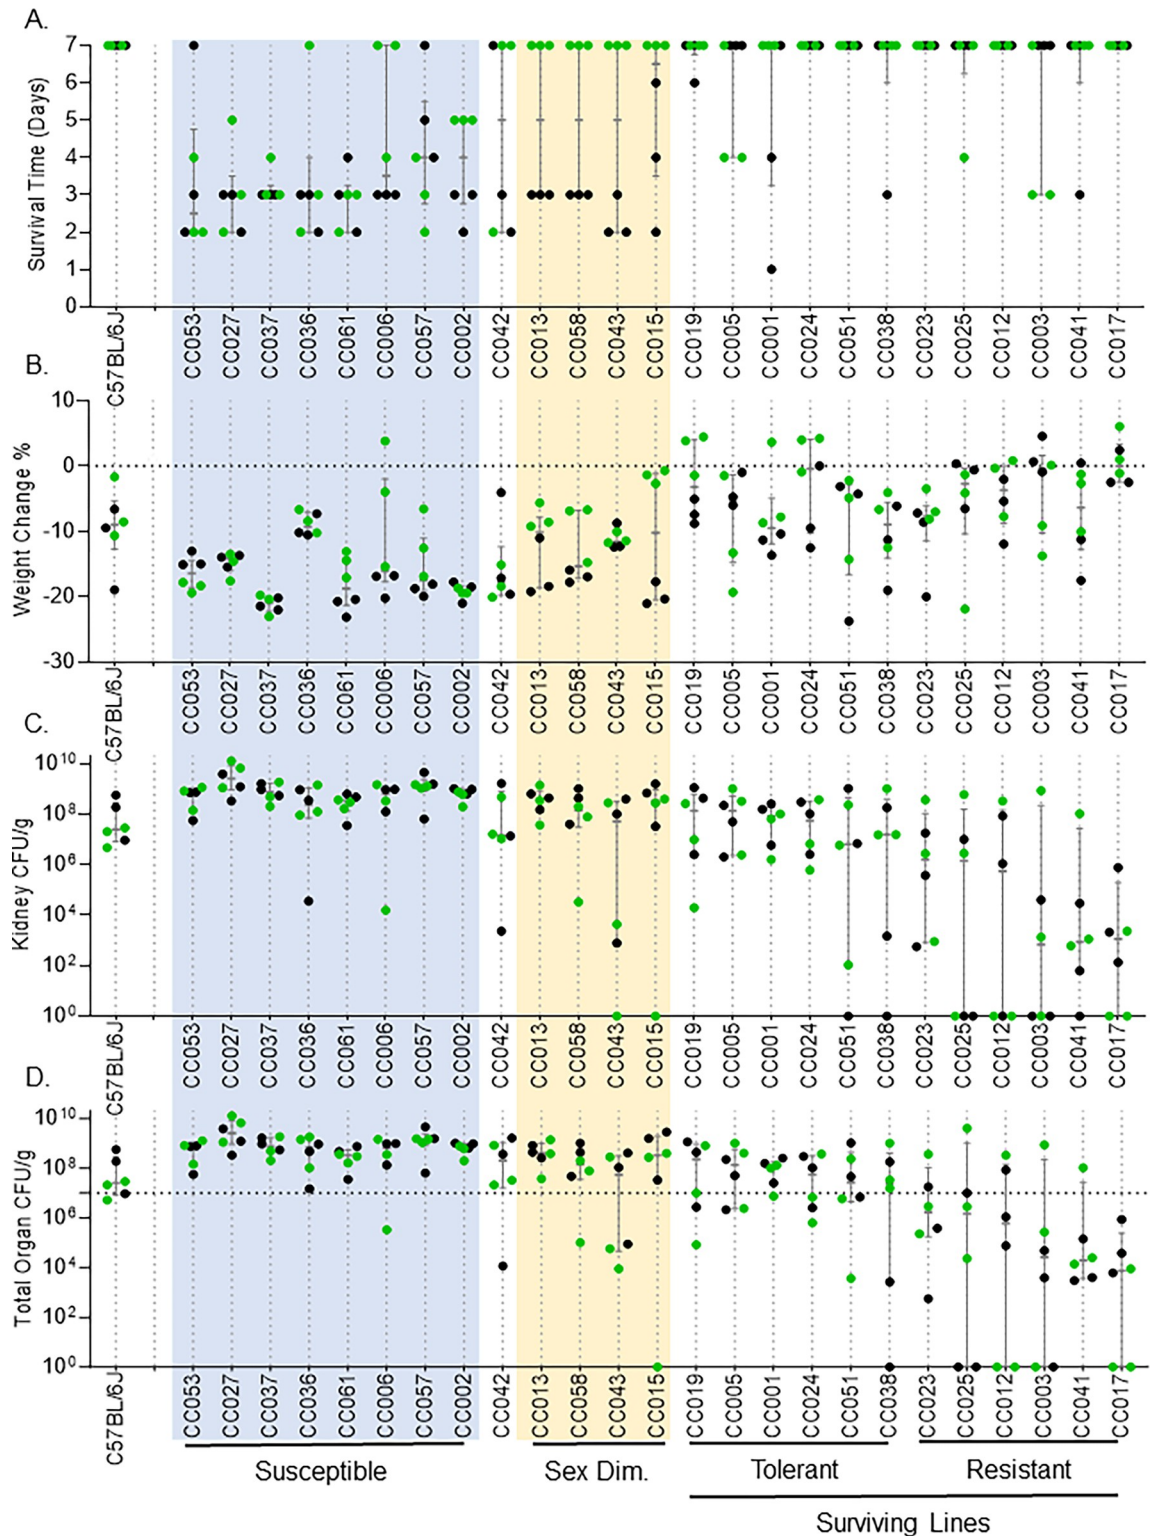

**Fig 1. CC strains exhibit a diverse response to MRSA infection.** After intravenous infection with MRSA USA300 as described in the Materials and Methods section, we show: A. survival time, B. percent weight change after infection, C. kidney colonization, and D. Total organ colonization; horizontal dotted line represents inoculum dose. CC strains are shown in the ascending order of survival. If survival was equal between two or more strains, strains are arranged in descending order of total organ colonization (the combined colonization of all organs collected). Dots represent individual mice; black dots represent males; green dots represent females. The median and interquartile range are shown for each strain.

<https://doi.org/10.1371/journal.pgen.1011229.g001>

correlated with poor survival (Fig 2A). The inability to limit bacterial growth in the kidney has previously been associated with susceptibility to intravenous *S. aureus* infections in mice [26]. In our experiments, the kidney was the most highly colonized organ across all CC strains and high kidney colonization correlated with poor survival ( $R = -0.58$ ) (Figs 1C and 2A). Unexpectedly however, colonization in the liver ( $R = -0.78$ ), spleen ( $R = -0.73$ ), and lung ( $R = -0.67$ ) was more highly correlated with poor survival than colonization of the kidneys (Fig 2A), despite the fact that these organs had lower bacterial load than the kidneys (Fig 1C and 1D) and less tissue damage (Fig 2B). These data suggest that the spleen, liver and lung are more intolerant to colonization by MRSA and acute damage than the kidney during MRSA infection.

*S. aureus* causes damage to host tissue in mice as early as 48 hours after intravenous challenge [21]. To assess tissue damage in the CC mouse population, a board-certified pathologist scored each tissue blindly for damage (0 = normal to 4 = severe damage) (S2 Fig and S3 Table). Across all organs, resistant strains had significantly less tissue damage than tolerant ( $P < 0.001$ ) and susceptible strains ( $P < 0.010$ ) (Fig 2B). Interestingly, there was no significant difference in tissue damage between tolerant and susceptible strains ( $P = 0.57$ ) (Fig 2B). This finding suggests that tolerant strains may survive MRSA infection in the face of both high colonization and severe tissue damage.

High bacterial burden in kidneys translated to more significant tissue damage. Of the 25 CC strains we studied, 16 had a median pathology score of 2.5 or above for kidneys, indicating moderate to severe tissue damage (Fig 2B, Scale of 0–4, 0 = no damage, 4 = severe damage). This damage did not translate to susceptibility however, as histology scores across all five tissues that we sampled had only a weak correlation with poor survival (Fig 2A). Spleen damage had the highest correlation  $R = -0.23$  with poor survival, followed by kidney ( $R = -0.18$ ) and heart ( $R = -0.18$ ) damage. This weak correlation may be due to the diverse phenotypic responses exhibited by the CC strains to MRSA infection. Some infected CC strains met our euthanasia criteria very early in infection, perhaps before extensive tissue damage had time to occur. Other CC strains lived to the end of the experiment, allowing time for severe tissue damage to occur and become cumulative.

Pre-infection inflammation and immune parameters play a role in disease prediction and progression [42,58]. We collected blood from mice five weeks before infection to perform Complete Blood Counts (CBC). Interestingly, CC strains resistant to MRSA infection had a higher number of pre-infection circulating neutrophils than susceptible and tolerant strains (Fig 2C). There were no significant differences in other pre-infection CBC parameters (S2 Table).

### Survival is sex-dependent in four CC strains

In the four sexually dimorphic strains, females lived until the end of the experiment (day 7), but all the males met our euthanasia criteria much earlier (Fig 3A). Males lost more weight than females (Fig 3B) and had higher liver, spleen, and lung colonization (Fig 3C). Colonization did not differ significantly between males and females in the kidneys, the highest colonized organ in these strains (Fig 3C). Females of these CC strains appear to limit MRSA replication in some organs or spread from the kidneys by unknown mechanisms.

To assess baseline differences between males and females of the strains that were sexually dimorphic with respect to MRSA infection, we evaluated pre-infection complete blood counts (CBC). Males had higher circulating monocytes and red blood cells before infection than females of these strains (Fig 3D). The number of circulating monocytes ( $P = 0.83$ ) and red blood cells ( $P = 0.10$ ) were not significantly different between males and females in the rest of the CC

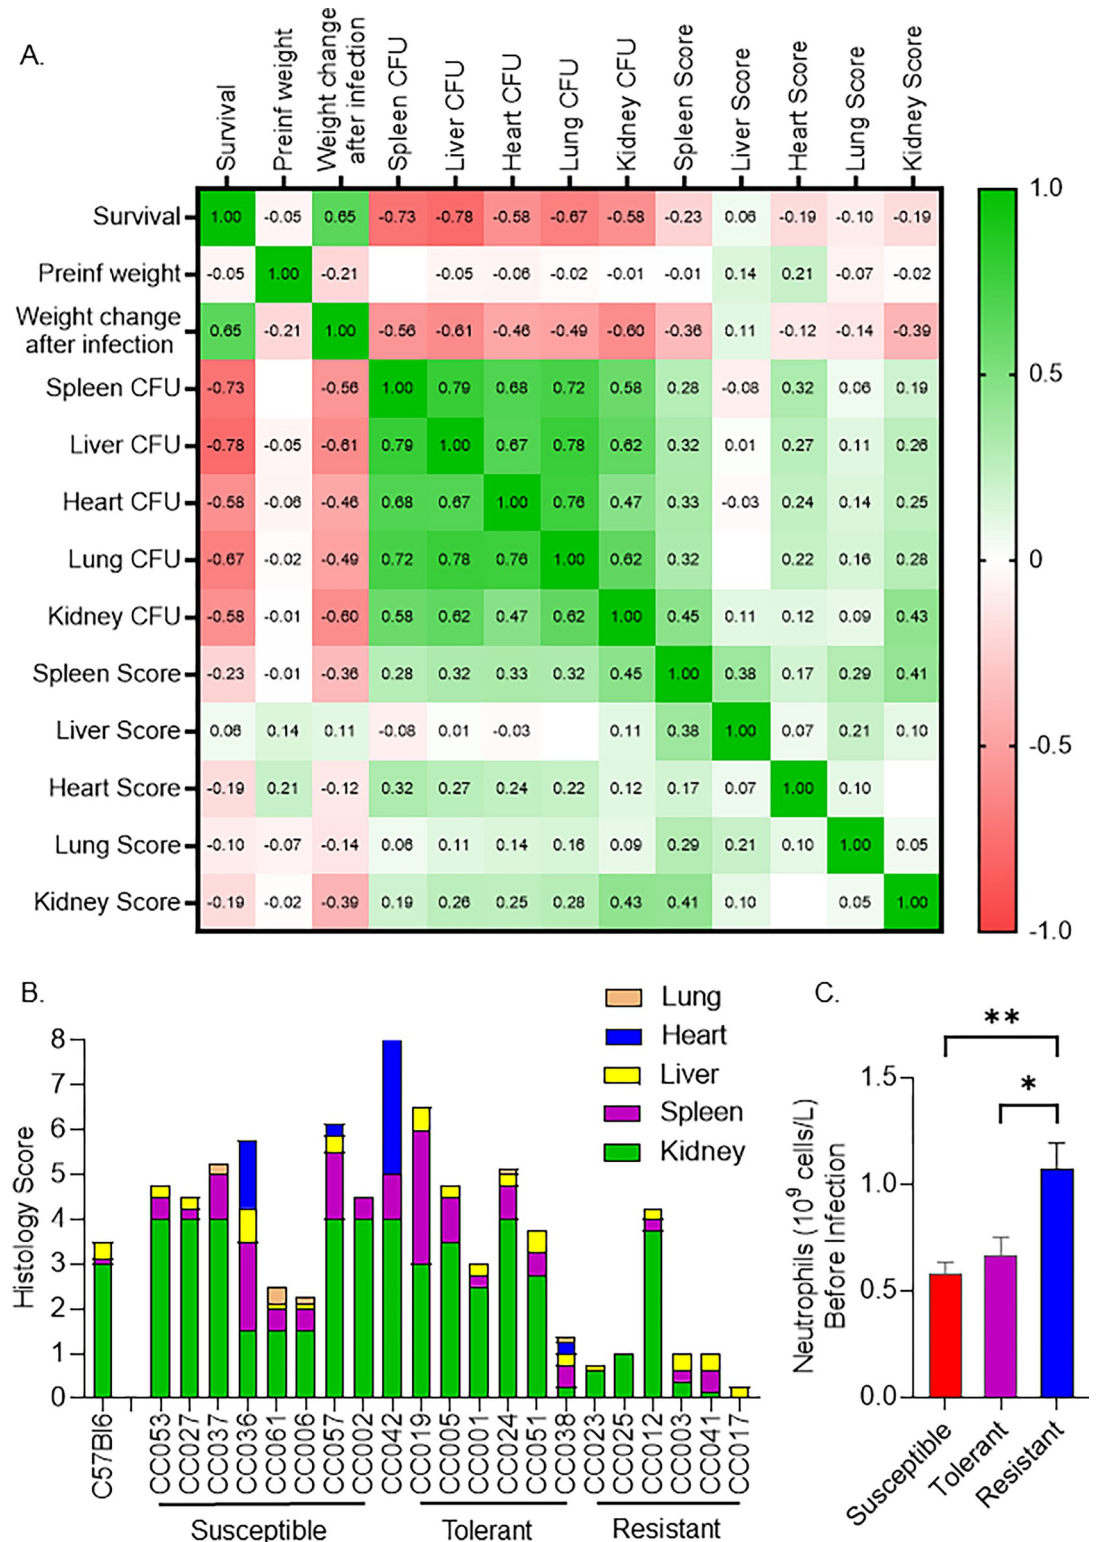

**Fig 2. Correlation of tissue colonization, histology scores and blood parameters with survival.** A. Heat map showing Spearman correlation 'R' values between survival, weight change, organ colonization, and tissue damage scores. B. A stacked bar plot showing the median tissue damage score for five organs (Kidney = green, spleen = purple, liver = yellow, heart = blue, lung = orange). Pathology in each tissue was blindly scored by a pathologist on a scale of 0 = no damage, to 4 = severe damage. C. Mean neutrophil levels in uninfected mice. Mann-Whitney tests were performed to determine statistical significance (\* =  $P < 0.05$ , \*\* =  $P < 0.01$ ).

<https://doi.org/10.1371/journal.pgen.1011229.g002>

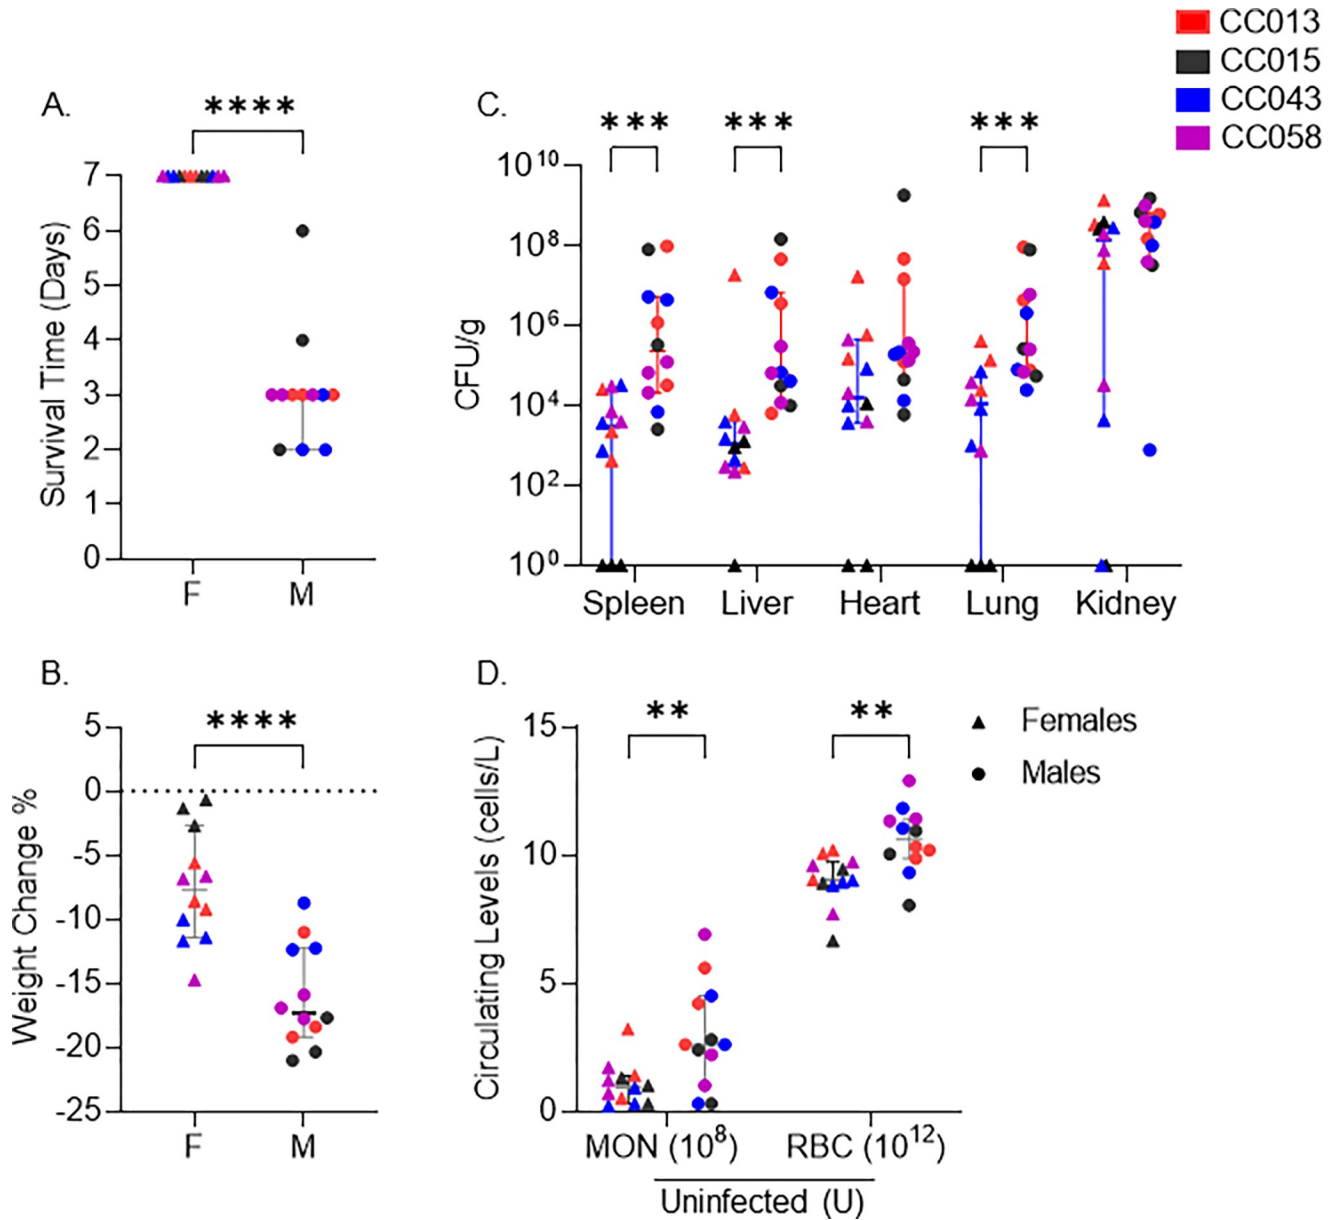

**Fig 3. Sexual dimorphism in survival after MRSA infection.** We present pooled data for the four strains that exhibited sexual dimorphism in survival: A. survival time, B. percent weight change after infection, C. colonization across organs, and D. pre-infection monocyte and red blood cell counts (U–Uninfected). Each point represents an individual mouse; filled circles represent males; triangles represent females. Each color represents a CC strain as noted in the legend. Medians with 95% confidence interval are shown for each strain. A, B, and D–Student’s T-test and C.

<https://doi.org/10.1371/journal.pgen.1011229.g003>

population (21 strains) (S2 Table). Thus, this difference in the starting blood parameters is unique to CC strains that displayed sexual dimorphism in susceptibility to MRSA infection.

### Baseline body temperature and baseline activity did not correlate with survival

To track the disease progression in infected mice, we used a combination of automated telemetry and manual health scoring (S2 Table). A surgically implanted telemetry device tracked body temperature and activity levels every minute before and throughout the infection (S6 and



S7 Figs). Telemetry data from five days before infection was used to create a baseline circadian pattern for each mouse. A machine-learning algorithm was also used to predict when infected mice deviated from their normal circadian pattern after infection. No significant differences were identified in the elapsed time between infection and deviation from the normal circadian pattern between surviving and susceptible strains (S2 Table). 90% of the infected mice deviated from their normal circadian pattern of body temperature and activity within 24 hours of infection (S3 Fig). The first health check performed by laboratory staff, 24 hours after infection, could only detect 56% of these mice. In the next two days, twice daily health checks detected all the remaining mice as ill (S3 Fig). These data suggest a significant lag time between circadian pattern disruption detected by telemetry and signs of illness detected by laboratory staff and the effectiveness of the telemetry system in accurately predicting survival after infection.

## Two independent genomic regions influence survival

We used RQTL2 software with CC genotypes imputed from qtl2qpi to identify genomic regions associated with survival after MRSA infection [59,60]. Within the CC strains we infected, survival was a highly heritable trait with a broad sense heritability score of 0.38 (S4 Table). While using only 25 CC strains reduces the power of QTL mapping [61], using 6 animals per strain and continuous monitoring using a telemetry device added more power to our study and allowed us to sensitively define the phenotypes we observed.

For early susceptibility (mice that our euthanasia criteria on days 2 and 3), there was a highly significant peak on chromosome 18 for day 2 (Fig 4A). We named this QTL peak ESMI (Early Susceptibility in MRSA Infection). This peak disappeared after day 3 post-infection. For late survival (days 6 and 7), there was a highly significant peak on Chromosome 3 for day 7 (Fig 4B). We named this peak LSMI (Late Survival in MRSA Infection). To understand the impact of sexually dimorphic strains on survival, we performed the same analysis after removing those four strains. The early susceptibility peak on Chr 18 and late survival peak on Chr 3 were retained (S4 Fig), suggesting that the sexually dimorphic strains did not influence our QTL peaks. We compared the phenotype at the top SNPs in both peaks for potential interaction (S5 Table). No significant interactions were identified, suggesting that our QTL regions act independently of each other.

## *Npc1* is a strong candidate for influencing early susceptibility during MRSA infection

The advantage of the CC panel over other outbred mouse panels is the high number of SNPs and structural variants present across the CC genomes [36,37]. We used this feature to shortlist the genes within the associated genomic regions to identify those of most interest. The early susceptibility QTL peak, ESMI, on chromosome 18 is a 5 Mb region between 12–17 Mb with a peak around 14.67 Mb. This region contains 21 protein-coding genes and 49 non-coding RNA genes. Because the CC strains are a mosaic of eight inbred founder strains, we looked at the founder effect plot in this region to attempt to identify each founder's contribution to survival (S5A Fig and S5 Table). We found that the WSB allele in this region contributes to reduced survival, while A/J and NZO alleles contribute to prolonged survival (Fig 5A). Using all the SNPs, insertions and deletions that matched this allele effect pattern in the Mouse Phenome Database (MPD), we identified 20,582 variants across all 21 genes. We used Variant Effect Predictor (VEP) to further prioritize these variants based on their predicted effect on protein structure and function, identifying 52 high and moderate-impact variants in 7 genes (S6 Table). The highest impact variant for each gene is listed (Fig 5B). Four of the seven genes we shortlisted have previously been associated with immune function in the Mouse Genome

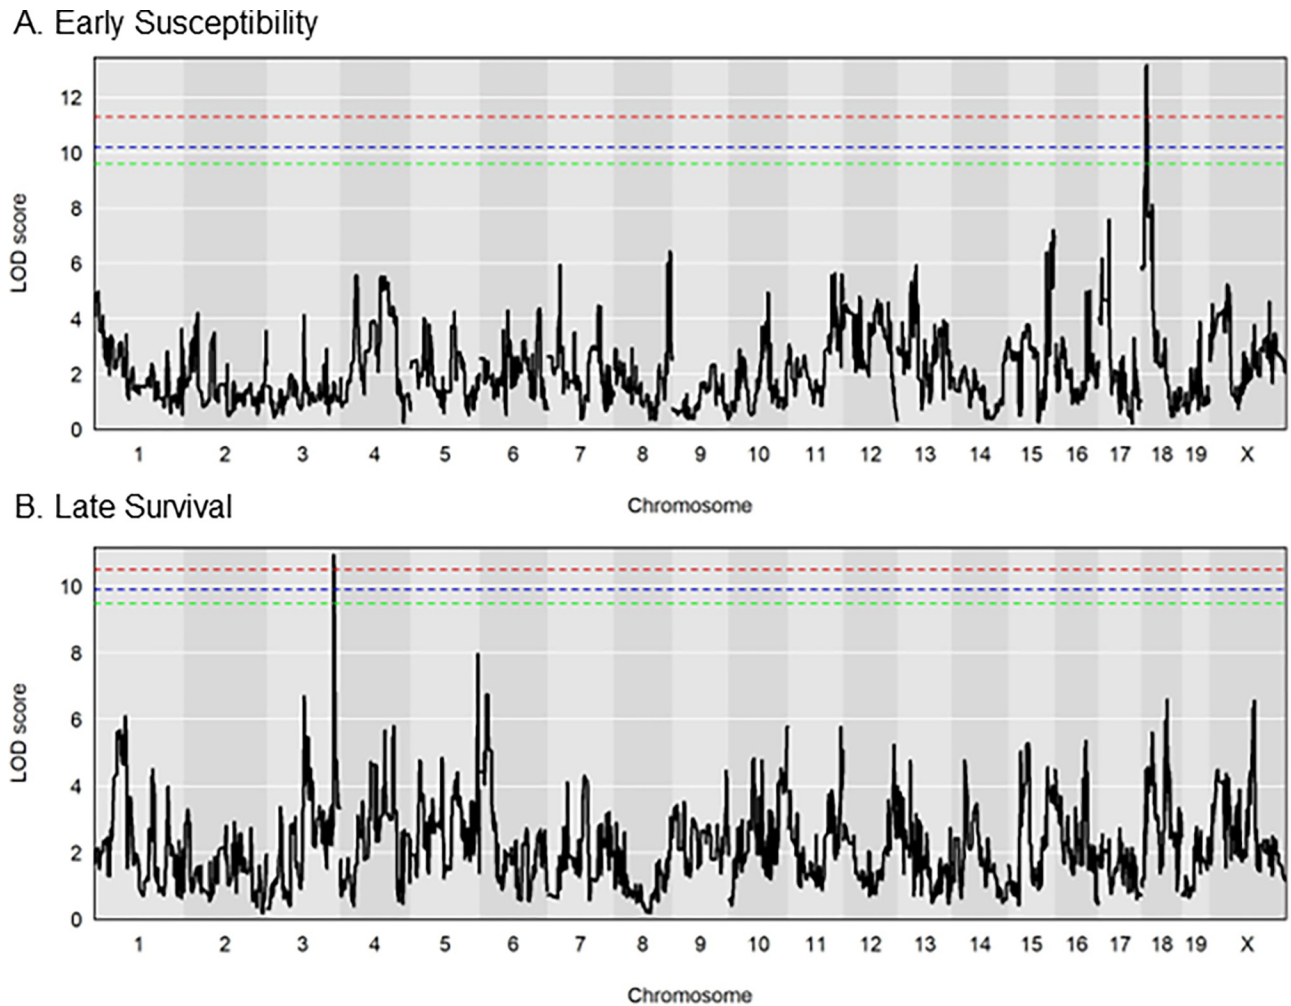

**Fig 4. Genomic regions involved in survival after MRSA infection.** LOD plots for square root transformed survival phenotype (percentage of animals that survived at the end of each day). A. Early susceptibility in MRSA infection (ESMI, day 2 post-infection) peak on chromosome 18. B. Late survival in MRSA infection (LSMI, day 7 post-infection) peak on chromosome 3. The dotted (Red– 95%, Blue– 90%, Green– 85%) lines represent the significant LOD scores for 999 permutations.

<https://doi.org/10.1371/journal.pgen.1011229.g004>

Informatics Portal (highlighted in red, Fig 5B) [62]. We sequenced mRNA from kidneys collected from CC strains at necropsy (at least one male and one female per strain) to further prioritize genes. Then, we looked for differentially expressed genes that matched the founder effect pattern within this region. For the early susceptibility QTL peak, two genes, Cadherin2 (*Cdh2*) and NPC intracellular cholesterol transporter 1 (*Npc1*), matched the founder effect pattern (Fig 5C). *Npc1* is our top candidate in this region due to its previous association with immune functions [63,64].

### ***Ifi44l* is a strong candidate for involvement in late survival after MRSA infection**

The late survival QTL peak, LSMI, on chromosome 3 is a 4 Mb region between 146–150 Mb with a peak near 146.66 Mb. This region contains 13 protein-coding genes and 39 non-coding RNA genes. The A/J allele in this region reduced survival significantly, while CAST, NOD, NZO, and WSB alleles promoted longer survival (Figs 6A and S5B). Using this founder effect

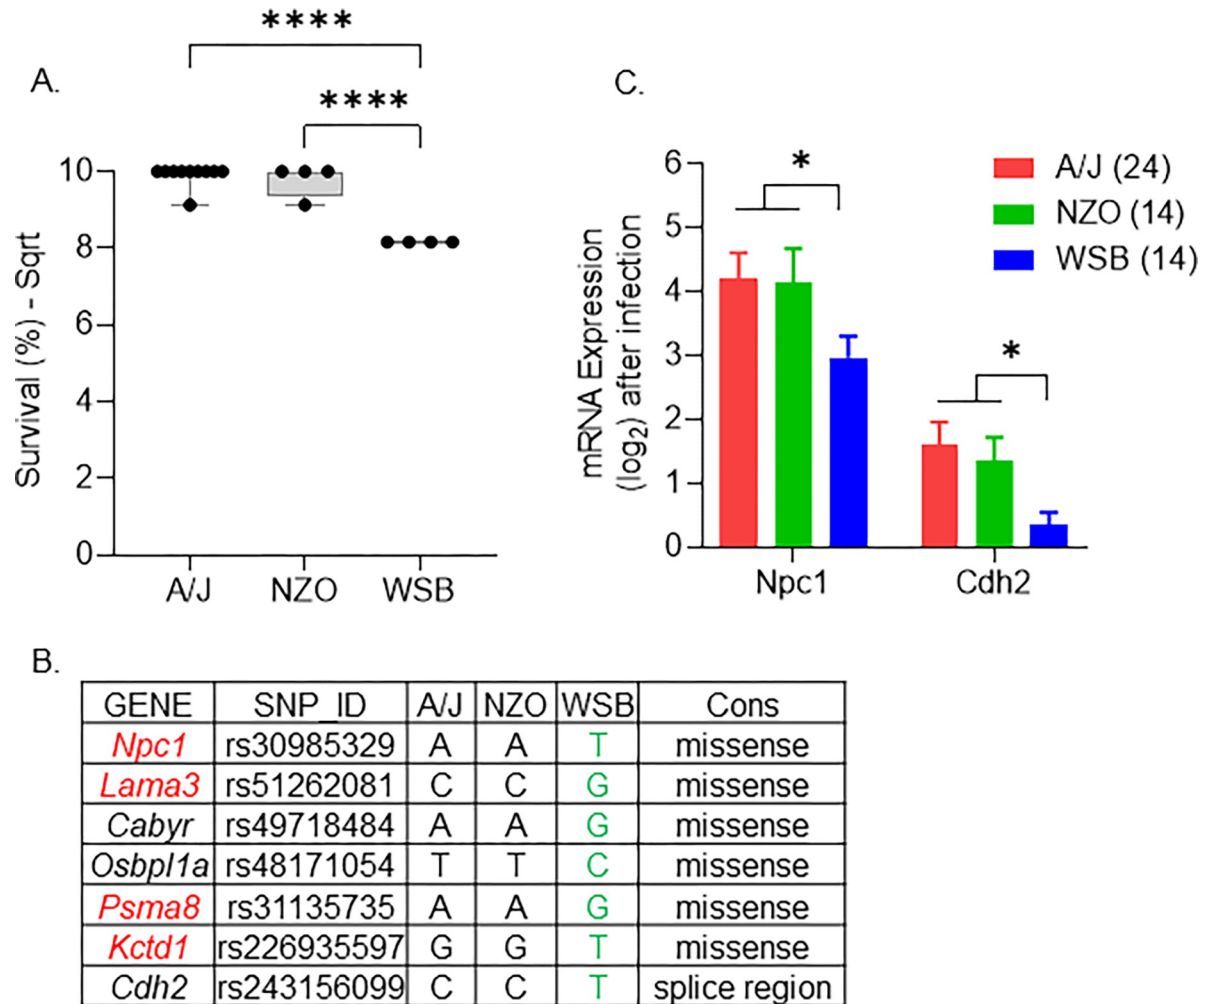

**Fig 5. Strongest candidate genes on chromosome 18 for early susceptibility.** A. Box plot showing the founder allele contribution at the highest marker on the peak. Each dot represents a strain, lines represent minimum to maximum. B. Genes with high-impact variants shortlisted using the founder effect pattern. C. Mean kidney mRNA expression values after infection (log-transformed). The number of animals is given within brackets. Lines represent standard error of the mean values. ANOVA with multiple comparison correction using Tukey test was performed (\*\*\*\* =  $P < 0.0001$ ).

<https://doi.org/10.1371/journal.pgen.1011229.g005>

pattern, we shortlisted five genes with variants predicted to have a high impact on the function of the encoded proteins (S6 Table). The top variant for each gene is listed (Fig 6B). Two genes in the Interferon Stimulated Gene family (ISG), Interferon induced proteins 44 and 44l genes (*Ifi44* and *Ifi44l*), are our primary candidates at this locus. *Ifi44* has a missense mutation, and *Ifi44l* has a high-impact mutation in the gene's promoter region. In mice and humans, *Ifi44l* is a paralog of *Ifi44*, but it remains unclear if *Ifi44* and *Ifi44l* have redundant or distinct functions [65]. Using gene expression data, we determined that *Ifi44l* is highly expressed in strains with the A/J allele but not with the alleles from the other founders (Fig 6C). Thus, *Ifi44l* became our top candidate gene influencing late survival during MRSA infection.

## Discussion

We used a genetic screen of CC mouse strains to determine whether mice of different genetic backgrounds have diverse disease outcomes after intravenous infection with MRSA USA300,

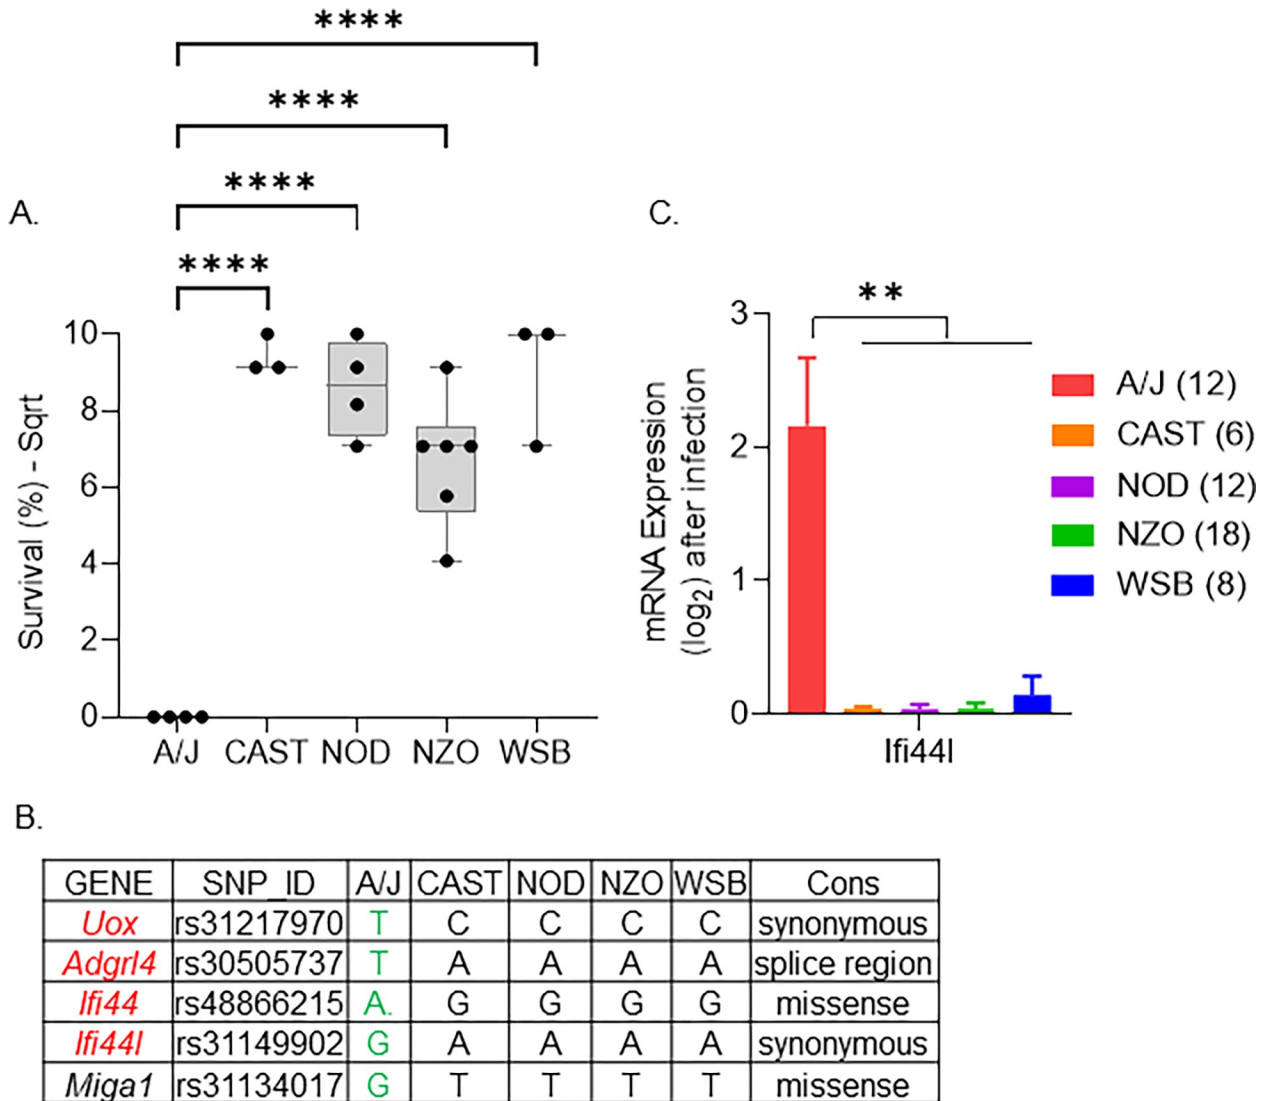

**Fig 6. Strongest candidate genes on chromosome 3 for late survival.** A. Box plot showing the founder allele contribution at the highest marker on the peak. Each dot represents a strain, lines represent minimum to maximum. B. Genes with high-impact variants shortlisted using the founder effect pattern. C. Mean kidney mRNA expression values after infection (log<sub>2</sub>-transformed). The number of animals sequenced for each founder allele is within the brackets. Lines represent standard error of the mean values. ANOVA with multiple comparison correction Tukey test was performed (\*\*\*\* = P < 0.0001).

<https://doi.org/10.1371/journal.pgen.1011229.g006>

and ultimately to identify regions of the genome linked to survival. We identified 8 CC strains that were highly susceptible to fatal infection, 4 strains with strong sexually dimorphic survival, 6 strains that appeared tolerant, and 6 strains that were resistant to MRSA infection (even totally clearing the pathogen in several cases). Survival, bacterial colonization, and weight loss differed even within a given phenotypic category. Across 8 CC strains that we determined to be susceptible to MRSA sepsis based on reduced survival after infection, survival time ranged from 2.5 to 4 days, and kidney colonization varied as much as 10-fold. Two susceptible strains, CC061 and CC036 had very similar kidney colonization, yet CC061 appeared to have a more severe disease and lost twice as much weight as CC036 (19% vs. 9%). We also observed similar diversity in weight loss and colonization within tolerant and resistant strains. Our data support both the importance of host genetics in disease outcome after MRSA infection, but also the

hypothesis that there may be multiple mechanisms of susceptibility, tolerance and resistance to MRSA infection across a broad set of host genetics.

In both animals and humans, males are more susceptible than females to bacterial infections [66]. Some of these differences can be attributed to the differences in X-chromosome number and inactivation process between males and females. The X-chromosome also encodes several critical immune genes that may play important roles in sexually dimorphic infection outcomes [67]. Males have a higher overall risk for MRSA carriage [68] and bloodstream infections [69,70]. However, there is no consensus on the role of gender on mortality [70–74]. Across all CC strains in our study females survived longer than males. We determined that this difference was driven by 4 CC strains that exhibited strong sexual dimorphism in survival, despite similar levels of kidney colonization in both sexes.

Two blood parameters, pre-infection baseline numbers of circulating monocytes and red blood cells, were higher only in males of the CC strains that exhibited sexually dimorphic survival phenotypes in response to MRSA infection. This finding suggests that increased numbers of circulating monocytes and red blood cells may be linked to susceptibility of males of these CC strains to severe MRSA infection. *S. aureus* persists within monocyte-derived macrophages and can use these cells as a vehicle for dissemination [75,76]. Furthermore, heme iron is the preferred source of iron for *S. aureus* during infection [77], and this organism can bind and lyse RBCs [78–80] and directly bind hemoglobin [81] [82]. Thus, in males of these CC strains, increased pre-infection circulating monocytes may facilitate more efficient MRSA dissemination while increased heme availability may provide an additional source of iron for MRSA during infection.

Neutrophils are the primary defense against *S. aureus* infections [7,83], and patients with impaired neutrophil numbers and/or function are predisposed to *S. aureus* infections [84–86]. We noticed that pre-infection circulating neutrophil numbers were significantly higher in our MRSA-resistant CC strains than in the tolerant and susceptible strains. Our data is consistent with observations in humans, supporting a critical role for neutrophils in resistance to MRSA infection in several CC strains.

Most of the CC strains we used in this study were also used to define disease outcome after oral infection with non-typhoidal *Salmonella* [51,52]. Six of the eight CC strains that were susceptible to MRSA infection were also susceptible or delayed susceptible to *Salmonella* infection (CC006, CC027, CC036, CC037, CC053, CC061). The remaining two MRSA susceptible CC strains, CC002 and CC057, were resistant and tolerant to *Salmonella* infection respectively [52]. One CC strain, CC038, was tolerant to both MRSA and *Salmonella* infection. However, all of the remaining CC strains we tested had different disease outcomes in MRSA infection than they did after *Salmonella* infection. The phenotypes we discovered suggest that some of the mechanisms of susceptibility to severe MRSA and *Salmonella* infection may be shared, while the mechanisms of tolerance and resistance to these two pathogens are largely distinct.

We compared our MRSA infection outcome data to a similar study of *Mycobacterium tuberculosis* (Mtb) infection in CC strains [47]. While this study did not classify survival phenotypes, we used the median lung colonization values as a rough proxy for disease severity. For the 52 CC strains infected with Mtb, log lung CFU ranged from 5.1 to 8.5, with a median of 6.7 CFU [47]. Among the six MRSA-susceptible CC strains that were also infected in Mtb studies, two strains (CC027, CC037) were sensitive to both *Salmonella* and MRSA infection and were also heavily colonized by Mtb in the lung [47,51,52]. A common mechanism may underlie the susceptibility of these CC strains to three very different bacterial pathogens, administered by different routes.

We also identified CC strains that were not uniformly susceptible to all three pathogens. Two CC strains susceptible to both MRSA and *Salmonella* (CC006, CC061) were poorly

colonized in the lung with *Mtb* (5.6 and 6.5 log CFU) [47]. Finally, all five MRSA-resistant CC strains were highly colonized in the lung with *Mtb* (average = 8.4 log CFU), and thus appear to be potentially highly susceptible to *Mtb* infection. The MRSA-tolerant strains had variable *Mtb* colonization in the lung. This differential response to different bacterial pathogens suggests that most CC strains that we tested do not have a significant general dysfunction of immunity, where we would expect broad susceptibility to multiple pathogens. Future work will tease out specific mechanisms of susceptibility and resistance to different pathogens.

Using the survival data that we generated in this study, we identified QTL linked to both early susceptibility and late survival after intravenous MRSA infection. The primary candidate gene in the early susceptibility QTL, *Npc1*, is in endosomal and lysosomal membranes and mediates intracellular cholesterol trafficking [87]. In humans, mutations in *NPC1* cause Niemann–Pick Type C disease, leading to massive accumulation of cholesterol in lysosomes in all tissues and premature death [88]. Defects in *NPC1* can lead to increased lipid storage in macrophages and a chronic inflammatory condition [89,90]. *NPC1* is also the primary host factor responsible for Ebola, and other filovirus, entry into host cells [91]. These viruses use *NPC1* on endosomes and lysosomes to trigger a membrane fusion process that allows the expulsion of the viral genome into the cytoplasm and subsequent viral replication [92].

Little is known about the role of *NPC1* in bacterial infections. In a hematopoietic mouse model, *Npc1* mutant mice have a significant increase in the relative abundance of *Staphylococcus* spp. in their intestine [93], suggesting a role for *Npc1* in keeping *Staphylococcus* spp. at a low level in this niche. Mutations in *Npc1* impair steady-state autophagosome maturation and interfere with the autophagic trafficking of bacteria to lysosomes in macrophages [94]. *S. aureus* manipulates autophagy in both neutrophils and macrophages to promote its survival and escape [95–97]. CC strains carrying the WSB allele in this region have a missense mutation that affects the protein function in *Npc1*. Furthermore, these strains also have lower mRNA levels of *Npc1* (Fig 5C). This altered form or amount of *Npc1* may interfere with autophagy in macrophages and neutrophils, such that *S. aureus* can survive initial phagocytosis leading to the early susceptibility phenotype.

The A/J allele on Chromosome 18 contributed to poor survival of MRSA infected mice on day 7. A/J mice are also highly susceptible to SH1000, a different strain of *S. aureus* [26]. *Ifi44l* promotes macrophage differentiation during bacterial infection and facilitates inflammatory cytokine secretion [98]. Overexpression of *Ifi44* or *Ifi44l* is sufficient to control respiratory syncytial virus (RSV) infection [65]. *Ifi44l* represses the interferon response, protecting the host from the negative effects of the innate immune response during viral infection [99]. The A/J *Ifi44l* allele may be less effective in controlling the interferon response, reducing the survival of *S. aureus* infected mice in the later stages of infection.

A series of previous studies examined the genetic differences that influence *S. aureus* Sanger-476 infection in A/J and C57BL/6J mice using a chromosome substitution strain (CSS) model [27–29]. Although C57BL/6 and A/J mice are among the CC founders, we did not identify any genes in common with this previous work. Like USA300, Sanger-476 is a community-acquired strain but is sensitive to methicillin [100]. USA300 also has additional pathogenicity islands that are absent in the Sanger-476 strain [101] and also produces higher amounts of virulence factors compared to other MRSA strains [30,102,103]. These genetic differences make USA300 distinct from, and potentially more virulent than, other community-acquired clones of MRSA. On the host side, the CC founders include six additional inbred strains, making the CC strain collection considerably more genetically diverse than the CSS panel. The fact that the genetic regions we identify as linked to survival in this study did not overlap with those of the previous study is thus likely due to use of different *S. aureus* strains, more diverse mouse strains and different mapping power [27]. However, given that earlier work using the CSS

panel identified increased inflammation and defective immune responses as critical to MRSA resistance, we were encouraged to identify *Npc1* and *Ifi44l* as potential influencers of survival, as these genes are also involved in modulating inflammation and influencing immune responses.

The CC panel has previously been used to identify mouse strains for new model generation [33]. Although it was not a goal of this study to identify new mouse models for different MRSA caused syndromes, our analysis of pathology across different CC strains suggested that several strains may be make suitable models to fill gaps in our knowledge of cardiac disease, pneumonia, and recovery from *S. aureus* systemic infections. *S. aureus* is the leading cause of infective endocarditis (IE), which is associated with high mortality (40–50%) [104,105]. Current models of IE require anesthetizing C57BL/6J mice and physically damaging their heart valve using a catheter [106,107]. *S. aureus* is also the most common cause of bacterial myocarditis, with fatal outcomes [108–110]. Currently, there are no murine models to study MRSA induced myocarditis. In our study, three CC strains (CC013, CC036, C0042) had over 200-fold greater colonization in the heart than C57BL/6J mice and had systemic embolic bacterial purulent myocarditis. Similarly, pneumonia caused by *S. aureus* has a high mortality rate [111]. In our study, CC013, CC058, and CC061, had significant lung damage. Finally, we identified six MRSA-resistant CC strains (CC023, CC025, CC012, CC003, CC041, and CC017) that robustly survive systemic infection, have lower bacterial colonization, and in most cases less tissue damage than the traditional resistant mouse model for MRSA: C57BL/6J mice [26,29]. We hope that the lines we list above will be studied in more detail and may provide a useful resource for various *S. aureus* based syndromes.

In summary, using colonization, telemetry, survival, and histology data, we have identified diverse disease outcomes after MRSA USA300 infection in and described two novel genomic regions that influence survival at different stages after systemic infection. In addition, our work suggests several interesting pre-infection correlates that appear to influence survival after MRSA infection, and a connection between sex and susceptibility to MRSA infection in certain genetic backgrounds. With several *S. aureus* vaccines failing at human clinical trials [112,113], our data support strong consideration of host genetics as an important factor while designing therapeutics and vaccines against pathogens. Finally, as the CC strains have now been infected with multiple bacterial pathogens, future work will use the phenotypic diversity of host responses to infection of this mouse collection to define different mechanisms of susceptibility, tolerance and resistance.

## Materials and methods

### Ethics statement

All mouse studies followed the Guide for the Care and Use of Laboratory of Animals of the National Institutes of Health. The animal protocols (2015–0315 D and 2018–0488 D) were reviewed and approved by Texas A&M Institutional Animal Care and Use Committee (IACUC).

### Bacterial strains and media

Methicillin-resistant *Staphylococcus aureus* isolate used in this study was the kind gift of Dr. Magnus Hook (Texas A&M Institute of Biosciences and Technology, Houston). USA300 is a fully virulent, community-acquired clone of MRSA. Strains were routinely cultured in Luria-Bertani (LB) broth and plates supplemented with antibiotics when needed at 50 mg/L Kanamycin Sulphate. For murine infections, strains were grown aerobically at 37°C to a stationary phase in LB broth supplemented with Kanamycin.

## Murine strains

Both conventional (C57BL/6J) and Collaborative Cross mice were used for these experiments. In total, three males and three females belonging to 25 different CC strains (chosen at random) and C57BL/6J were used (156 mice total). All mice were initially purchased from UNC's Systems Genetics Core Facility (SGCF). They were bred independently at the Division of Comparative Medicine at Texas A&M University (S1 Table). Mice were fed Envigo Teklad Global 19% Protein Extrudent Rodent Diet (2919) or Envigo Teklad Rodent Diet (8604) based on strain need. Mice were provided with cardboard huts, food, and water ad libitum.

## Placement of telemetry devices

Mice (5–7 weeks old) were anesthetized with an isoflurane vaporizer using the Kent Scientific SomnoSuite Low-flow anesthesia system to implant telemetry devices. A midline abdominal incision was made, and Starr Life Science G2 Emitter devices were sutured to the ventral abdominal wall. The abdominal muscle layer was sutured with 5–0 vicryl, and the skin layer was closed using stainless steel wound clips. Buprenorphine (0.0001 mg/g) was administered intraperitoneally before recovery from anesthesia. Mice were monitored twice daily for surgical complications and humanely euthanized when needed. Surgical clips were removed on the seventh day, and animals were allowed to recover for one more week.

## Infection with MRSA

After baseline scoring for health, 6 mice (now 8–12 weeks old) per CC strain were infected with MRSA USA300. We chose a 7-day screening period and very sensitive telemetry monitoring of MRSA infected animals in an attempt to capture and identify range of disease phenotypes from highly susceptible to resistant. To minimize batch effects, mice from a given CC strain were infected in different experiments across a two-year period. This approach may have resulted in some within strain variability in infection outcomes. Briefly, Mice were anesthetized using isoflurane and infected with  $1 \times 10^7$  CFU in 50  $\mu$ l of LB broth intravenously at the inferior fornix into the retro-orbital sinus. For each experiment, mice were inoculated at the same time of day. Mice that became moribund within 6 hours of infection were humanely euthanized and removed from the experiment.

## Health monitoring

After the recovery from surgery, mice were moved to a BSL-2 facility and acclimated for 5–7 days. Individual cages containing implanted mice were placed onto ER4000 receiver platforms and calibrated to receive signals from the implanted telemetry devices. The outputs, body temperature (once per minute) and gross motor activity (summation of movement per minute), were continuously fed to a computer system for visualization (S6 and S7 Figs). This sensitive continuous monitoring allowed us understand disease progression for each animal in real-time, as disruptions of the normal circadian pattern of core body temperature after infection indicated symptomatic MRSA infection. A machine-learning algorithm was used to identify the time to deviation from the circadian pattern of body temperature and activity. Detailed explanation of the methodology and calculations can be found here [51].

We manually scored four health parameters twice daily: physical appearance, body conditioning, and provoked and unprovoked behavior. The scoring scale ranged from 0–3, with zero = normal and three = abnormal (S2 Table). Additionally, as a measure of activity, four small nestlets were placed at each corner of the cage in the evening. The following day, the number of nestlets moved from the cage corners into the hut was noted.



### Euthanasia criteria

After infection, mice were monitored continuously using telemetry readings and twice daily using visual health scoring. For telemetry, euthanasia criteria were defined by a sudden drop in temperature (3°C or more). For manual health scoring, the euthanasia criteria were reached when the combined health score exceeded 8. Mice that met one or both these criteria were humanely euthanized by CO<sub>2</sub> asphyxiation.

### Bacterial load determination

After euthanasia, whole blood, serum, and organs (spleen, liver, heart, lung, and kidney) were collected. A consistent region of each organ was collected in 3mL ice-cold PBS and homogenized. The serially diluted homogenate was plated on LB plates supplemented with kanamycin for bacterial enumeration in each organ. Data are expressed as CFU/g of tissue. Total organ colonization was calculated by adding CFU/g values of all the five organs collected.

### Histopathology

After euthanasia, portions of collected organs were fixed in 10% neutral buffered formalin for 24 hours and stored in 70% ethanol. Fixed tissue was embedded in paraffin, sectioned at 5 μm, and stained with hematoxylin and eosin (H&E). A board-certified veterinary pathologist scored all the slides for tissue damage on a scale of 0 to 4 in a blinded manner (S3 Table). All the raw pathology data is available in the supplementary file (S2 Table). Whole slide images of H&E-stained tissue sections were captured as digital files by scanning at 40X using a 3D Histech Panoramic SCAN II FL Scanner (Eprexia, MI). Digital files were processed by Aiforia Hub (Cambridge, MA) software to generate images with scaled bars.

### Complete blood count

One week before the implantation of telemetry devices, whole blood was collected from each mouse by submandibular bleeding. From the same mice, blood was collected at necropsy after infection by cardiac puncture. Abaxis VetScan HM5, optimized for rodents, was used to analyze blood collected in Ethylene Diamine Tetra Acetic acid (EDTA) tubes. The ratio between the blood parameters after and before infection (value >1 = increased after infection and value < 1 = decreased after infection) was calculated and reported.

### Heritability

Broad-sense heritability ( $H^2$ ) was calculated using the formula  $H^2 = V_G/V_P = V_G/(V_E + V_G)$  as previously described [114,115].  $V_E$  and  $V_G$  are the variance explained by the environmental and the genetic component respectively while  $V_P$  is the total phenotypic variance for a given phenotype. Detailed explanation of the calculation can be found here [116].

### QTL analysis

QTL analysis was performed using R/qtl2 software [59]. This method accounts for the complex population structure in CC strains. Briefly, genotype probabilities were imputed from the QTL viewer [60]. Genome scans were performed on the transformed phenotype using the scan1 function. The generated Logarithm of Odds (LOD) score is the likelihood ratio comparing the hypothesis of a QTL at a given position versus that of no QTL. We used the number of mice within a strain that survived at the end of each day as the phenotype. The phenotype was randomly shuffled 999 times to establish genome-wide significance, and LOD scores were calculated for each iteration using the scan1perm function [117]. The 85<sup>th</sup> percentile of the scores

was considered significant for that phenotype. The genomic confidence interval was calculated by dropping the LOD scores by 1.8 for each significant peak. Mouse Genome Informatics (MGI) was used to find the genes and QTL features within each interval using mouse genome version GRCm38 [118]. To further shortlist candidate genes, the founder strain distribution pattern was queried against the CC variant database (V3 Version). The Variant effect predictor [VEP] from the ensemble genome database was used to calculate the impact score for the variants [119].

### RNA extraction and sequencing

Total RNA was extracted from frozen tissues using Direct-zol RNA Miniprep plus kit following the manufacturer's protocol (Zymo Research—R2073). The purity and quantity of the extracted RNA were analyzed using RNA 6000 Nano LabChip Kit and Bioanalyzer 2100 (Agilent CA, USA, 5067–1511). High-Quality RNA samples with RIN number > 7.0 were used to construct the sequencing library. After total RNA was extracted, mRNA was purified from total RNA (5 $\mu$ g) using Dynabeads Oligo (dT) with two rounds of purification (Thermo Fisher, CA, USA). Following purification, the mRNA was fragmented into short fragments using divalent cations under elevated temperature (Magnesium RNA Fragmentation Module (NEB, cat. e6150, USA) under 94°C 5–7min). Then the cleaved RNA fragments were reverse-transcribed to create the cDNA by SuperScript II Reverse Transcriptase (Invitrogen, cat. 1896649, USA), which were next used to synthesize U-labeled second-stranded DNAs with E. coli DNA polymerase I (NEB, cat.m0209, USA), RNase H (NEB, cat.m0297, USA) and dUTP Solution (Thermo Fisher, cat. R0133, USA). An A-base was then added to the blunt ends of each strand, preparing them for ligation to the indexed adapters. Each adapter contained a T-base overhang for ligating the adapter to the A-tailed fragmented DNA. Dual-index adapters were ligated to the fragments, and size selection was performed with AMPureXP beads. After the heat-labile UDG enzyme (NEB, cat.m0280, USA) treatment of the U-labeled second-stranded DNAs, the ligated products were amplified with PCR by the following conditions: initial denaturation at 95°C for 3 min; 8 cycles of denaturation at 98°C for 15 sec, annealing at 60°C for 15 sec, and extension at 72°C for 30 sec; and then final extension at 72°C for 5 min. The average insert size for the final cDNA libraries was 300 $\pm$ 50 bp. At last, we performed the 2 $\times$ 150bp paired-end sequencing (PE150) on an Illumina Novaseq 6000 following the vendor's recommended protocol.

### RNA sequencing data analysis

Reads were trimmed using trim galore (version 0.6.7) [120–122]. This removed adapters, poly tails, more than 5% of unknown nucleotides, and low-quality reads containing more than 20% of low-quality bases (Q-value <20). Both forward and reverse hard trimmed at 100 base pairs. FastQC was used to verify data quality before and after cleaning [122]. Cleaned reads were aligned and counted against the mouse reference genome (GRCm39) using STAR (version 2.7.9a) aligner [123]. Downstream processing of the data was performed using IDEP 1.0 [124,125]. Gene counts were analyzed for differentially expressed genes using DESeq2 [126]

### Supporting information

**S1 Fig. Colonization in other organs.** A. Liver colonization. B. spleen colonization, C. heart colonization. D. lung colonization. Strains are shown in ascending order of survival. Where survival was equal, strains are arranged in descending order of total organ colonization. Dots represent individual mice; black dots represent males; green dots represent females. The

median and interquartile range are shown for each strain.  
(TIF)

**S2 Fig. Representative images of histology scoring scheme.** Tissues were sectioned and stained with H&E for scoring. Shows the 400X magnification of representative scoring for all the organs.

(TIF)

**S3 Fig. Time to deviation from the normal circadian pattern.** Plot showing the number of animals that deviated from their normal pattern as identified by telemetry system (machine—dot) vs. Laboratory worker (human—squares).

(TIF)

**S4 Fig. Impact of sex on QTL regions.** LOD plots for square root transformed survival phenotype excluding the four sexually dimorphic strains. A. Early susceptibility. B. Late survival. The dotted (Red— 99%, Blue— 95%, Green— 90%) lines represent the significant LOD scores for 999 permutations.

(TIF)

**S5 Fig. Founder effect pattern.** A. ESMI peak (day 2 post-infection) on chromosome 18. B. LSMI peak (day 7 post-infection) on chromosome 3.

(TIF)

**S6 Fig. Circadian pattern for all mice involved in the study.** Blue line represents temperature, black line represents activity and red line represents the time of infection.

(PDF)

**S7 Fig. Temperature change after infection.** Change in temperature for each mouse after infection (for 48 hours). The data is grouped by CC strain and colored lines in each plot represent the strain averages.

(PDF)

**S1 Table. Mouse strains used in this study.** Number of mice, origin, and location of breeding for all the mice used in the study.

(XLSX)

**S2 Table. Data associated with each mouse.** All the pre-infection and post-infection data associated with each mouse in the study.

(XLSX)

**S3 Table. Tissue scoring matrix with descriptions.** The final score per organ corresponds to the highest score assigned to a single category.

(XLSX)

**S4 Table. Heritability scores.** Broad range heritability scores for various phenotypes.

(XLSX)

**S5 Table. Founder contribution.** Sheet Chr18 –Founder contribution at the highest peak on chromosome 18 for ESMI. Sheet Chr3 –on chromosome 03 for LSMI.

(XLSX)

**S6 Table. Shortlisted variants for survival peaks.** Sheet Chr\_18 –high impact variants on chromosome 3 for ESMI. Sheet Chr\_3 –high impact variants on chromosome 3 for LSMI.

(XLSX)

## Acknowledgments

We thank Dr. Magnus Hook for providing the bacterial strain used in this study. We also thank Dr. Karl Broman (University of Wisconsin) for helpful discussions and troubleshooting problems in the *rqt12* google forum. We also would like to thank Dr. Callie Kobayashi, Dr. Joana Rocha, Ms. Marissa Talamantes, Mr. Chris Bowden, Mr. Connor Mathis, and Ms. Kaya Mariello for assistance with experiments.

## Author Contributions

**Conceptualization:** Manuchehr Aminian, David Threadgill, Helene Andrews-Polymeris.

**Data curation:** Aravindh Nagarajan, Kristin Scoggin, Manuchehr Aminian, Michael Kirby, Helene Andrews-Polymeris.

**Formal analysis:** Aravindh Nagarajan, L. Garry Adams, Michael Kirby, Helene Andrews-Polymeris.

**Funding acquisition:** David Threadgill, Helene Andrews-Polymeris.

**Investigation:** Aravindh Nagarajan, Kristin Scoggin, Jyotsana Gupta, L. Garry Adams, Michael Kirby.

**Methodology:** Aravindh Nagarajan, Kristin Scoggin, Jyotsana Gupta, L. Garry Adams.

**Project administration:** David Threadgill, Helene Andrews-Polymeris.

**Resources:** Helene Andrews-Polymeris.

**Software:** Manuchehr Aminian, Michael Kirby.

**Supervision:** Michael Kirby, David Threadgill, Helene Andrews-Polymeris.

**Validation:** Aravindh Nagarajan.

**Visualization:** Aravindh Nagarajan, Manuchehr Aminian, Helene Andrews-Polymeris.

**Writing – original draft:** Aravindh Nagarajan, David Threadgill, Helene Andrews-Polymeris.

**Writing – review & editing:** Aravindh Nagarajan, David Threadgill, Helene Andrews-Polymeris.

## References

1. Lowy FD. Staphylococcus aureus infections. *N Engl J Med*. 1998; 339(8):520–32. <https://doi.org/10.1056/NEJM199808203390806> PMID: 9709046
2. Krüger B, Weidenmaier C, Zipperer A, Peschel A. The commensal lifestyle of Staphylococcus aureus and its interactions with the nasal microbiota. *Nat Rev Microbiol*. 2017; 15(11):675–87. <https://doi.org/10.1038/nrmicro.2017.104> PMID: 29021598
3. Wertheim HF, Melles DC, Vos MC, van Leeuwen W, van Belkum A, Verbrugh HA, et al. The role of nasal carriage in Staphylococcus aureus infections. *The Lancet infectious diseases*. 2005; 5(12):751–62. [https://doi.org/10.1016/S1473-3099\(05\)70295-4](https://doi.org/10.1016/S1473-3099(05)70295-4) PMID: 16310147
4. Laux C, Peschel A, Krüger B. Staphylococcus aureus Colonization of the Human Nose and Interaction with Other Microbiome Members. *Microbiol Spectr*. 2019; 7(2). <https://doi.org/10.1128/microbiolspec.GPP3-0029-2018> PMID: 31004422
5. Tong SY, Davis JS, Eichenberger E, Holland TL, Fowler VG Jr. Staphylococcus aureus infections: epidemiology, pathophysiology, clinical manifestations, and management. *Clin Microbiol Rev*. 2015; 28(3):603–61. <https://doi.org/10.1128/CMR.00134-14> PMID: 26016486
6. Clarridge JE 3rd, Harrington AT, Roberts MC, Soge OO, Maquelin K. Impact of strain typing methods on assessment of relationship between paired nares and wound isolates of methicillin-resistant Staphylococcus aureus. *J Clin Microbiol*. 2013; 51(1):224–31. <https://doi.org/10.1128/JCM.02423-12> PMID: 23135945

7. Howden BP, Giulieri SG, Wong Fok Lung T, Baines SL, Sharkey LK, Lee JYH, et al. Staphylococcus aureus host interactions and adaptation. *Nature Reviews Microbiology*. 2023. <https://doi.org/10.1038/s41579-023-00852-y> PMID: 36707725
8. Haag AF, Fitzgerald JR, Penadés JR. Staphylococcus aureus in Animals. *Microbiol Spectr*. 2019; 7(3). <https://doi.org/10.1128/microbiolspec.GPP3-0060-2019> PMID: 31124433
9. Otto M. Community-associated MRSA: what makes them special? *Int J Med Microbiol*. 2013; 303(6–7):324–30. <https://doi.org/10.1016/j.ijmm.2013.02.007> PMID: 23517691
10. Lee AS, de Lencastre H, Garau J, Kluytmans J, Malhotra-Kumar S, Peschel A, et al. Methicillin-resistant Staphylococcus aureus. *Nat Rev Dis Primers*. 2018; 4:18033. <https://doi.org/10.1038/nrdp.2018.33> PMID: 29849094
11. Jevons MP, Coe AW, Parker MT. Methicillin resistance in staphylococci. *Lancet*. 1963; 1(7287):904–7. [https://doi.org/10.1016/s0140-6736\(63\)91687-8](https://doi.org/10.1016/s0140-6736(63)91687-8) PMID: 13957735
12. Turner NA, Sharma-Kuinkel BK, Maskarinec SA, Eichenberger EM, Shah PP, Carugati M, et al. Methicillin-resistant Staphylococcus aureus: an overview of basic and clinical research. *Nat Rev Microbiol*. 2019; 17(4):203–18. <https://doi.org/10.1038/s41579-018-0147-4> PMID: 30737488
13. Diekema DJ, Richter SS, Heilmann KP, Dohrn CL, Riahi F, Tendolkar S, et al. Continued emergence of USA300 methicillin-resistant Staphylococcus aureus in the United States: results from a nationwide surveillance study. *Infect Control Hosp Epidemiol*. 2014; 35(3):285–92. <https://doi.org/10.1086/675283> PMID: 24521595
14. Kempker RR, Farley MM, Ladson JL, Satola S, Ray SM. Association of methicillin-resistant Staphylococcus aureus (MRSA) USA300 genotype with mortality in MRSA bacteremia. *J Infect*. 2010; 61(5):372–81. <https://doi.org/10.1016/j.jinf.2010.09.021> PMID: 20868707
15. Kreisel KM, Stine OC, Johnson JK, Perencevich EN, Shardell MD, Lesse AJ, et al. USA300 methicillin-resistant Staphylococcus aureus bacteremia and the risk of severe sepsis: is USA300 methicillin-resistant Staphylococcus aureus associated with more severe infections? *Diagn Microbiol Infect Dis*. 2011; 70(3):285–90. <https://doi.org/10.1016/j.diagmicrobio.2011.03.010> PMID: 21558047
16. Parker D. Humanized Mouse Models of Staphylococcus aureus Infection. *Front Immunol*. 2017; 8:512. <https://doi.org/10.3389/fimmu.2017.00512> PMID: 28523002
17. Kim HK, Missiakas D, Schneewind O. Mouse models for infectious diseases caused by Staphylococcus aureus. *J Immunol Methods*. 2014; 410:88–99. <https://doi.org/10.1016/j.jim.2014.04.007> PMID: 24769066
18. McAdow M, DeDent AC, Emolo C, Cheng AG, Kreiswirth BN, Missiakas DM, et al. Coagulases as determinants of protective immune responses against Staphylococcus aureus. *Infect Immun*. 2012; 80(10):3389–98. <https://doi.org/10.1128/IAI.00562-12> PMID: 22825443
19. McAdow M, Kim HK, Dedent AC, Hendrickx AP, Schneewind O, Missiakas DM. Preventing Staphylococcus aureus sepsis through the inhibition of its agglutination in blood. *PLoS Pathog*. 2011; 7(10):e1002307. <https://doi.org/10.1371/journal.ppat.1002307> PMID: 22028651
20. Kuklin NA, Clark DJ, Secore S, Cook J, Cope LD, McNeely T, et al. A novel Staphylococcus aureus vaccine: iron surface determinant B induces rapid antibody responses in rhesus macaques and specific increased survival in a murine S. aureus sepsis model. *Infect Immun*. 2006; 74(4):2215–23. <https://doi.org/10.1128/IAI.74.4.2215-2223.2006> PMID: 16552052
21. Cheng AG, Kim HK, Burts ML, Krausz T, Schneewind O, Missiakas DM. Genetic requirements for Staphylococcus aureus abscess formation and persistence in host tissues. *FASEB J*. 2009; 23(10):3393–404. <https://doi.org/10.1096/fj.09-135467> PMID: 19525403
22. Cheng AG, McAdow M, Kim HK, Bae T, Missiakas DM, Schneewind O. Contribution of coagulases towards Staphylococcus aureus disease and protective immunity. *PLoS Pathog*. 2010; 6(8):e1001036. <https://doi.org/10.1371/journal.ppat.1001036> PMID: 20700445
23. Dyzenhaus S, Sullivan MJ, Albuquerque B, Boff D, van de Guchte A, Chung M, et al. MRSA lineage USA300 isolated from bloodstream infections exhibit altered virulence regulation. *Cell Host Microbe*. 2023; 31(2):228–42.e8. <https://doi.org/10.1016/j.chom.2022.12.003> PMID: 36681080
24. Takeuchi O, Hoshino K, Akira S. Cutting Edge: TLR2-Deficient and MyD88-Deficient Mice Are Highly Susceptible to Staphylococcus aureus Infection1. *The Journal of Immunology*. 2000; 165(10):5392–6.
25. Deshmukh HS, Hamburger JB, Ahn SH, McCafferty DG, Yang SR, Fowler VG Jr., et al. Critical role of NOD2 in regulating the immune response to Staphylococcus aureus. *Infect Immun*. 2009; 77(4):1376–82.
26. von Kockritz-Blickwede M, Rohde M, Oehmcke S, Miller LS, Cheung AL, Herwald H, et al. Immunological mechanisms underlying the genetic predisposition to severe Staphylococcus aureus infection in the mouse model. *Am J Pathol*. 2008; 173(6):1657–68. <https://doi.org/10.2353/ajpath.2008.080337> PMID: 18974303

27. Yan Q, Ahn SH, Medie FM, Sharma-Kuinkel BK, Park LP, Scott WK, et al. Candidate genes on murine chromosome 8 are associated with susceptibility to *Staphylococcus aureus* infection in mice and are involved with *Staphylococcus aureus* septicemia in humans. *PLoS One*. 2017; 12(6):e0179033. <https://doi.org/10.1371/journal.pone.0179033> PMID: 28594911
28. Yan Q, Sharma-Kuinkel BK, Deshmukh H, Tsalik EL, Cyr DD, Lucas J, et al. *Dusp3* and *Psme3* are associated with murine susceptibility to *Staphylococcus aureus* infection and human sepsis. *PLoS Pathog*. 2014; 10(6):e1004149. <https://doi.org/10.1371/journal.ppat.1004149> PMID: 24901344
29. Ahn SH, Deshmukh H, Johnson N, Cowell LG, Rude TH, Scott WK, et al. Two genes on A/J chromosome 18 are associated with susceptibility to *Staphylococcus aureus* infection by combined microarray and QTL analyses. *PLoS Pathog*. 2010; 6(9):e1001088. <https://doi.org/10.1371/journal.ppat.1001088> PMID: 20824097
30. Montgomery CP, Boyle-Vavra S, Adem PV, Lee JC, Husain AN, Clasen J, et al. Comparison of virulence in community-associated methicillin-resistant *Staphylococcus aureus* pulsotypes USA300 and USA400 in a rat model of pneumonia. *J Infect Dis*. 2008; 198(4):561–70. <https://doi.org/10.1086/590157> PMID: 18598194
31. Cheung GY, Wang R, Khan BA, Sturdevant DE, Otto M. Role of the accessory gene regulator *agr* in community-associated methicillin-resistant *Staphylococcus aureus* pathogenesis. *Infect Immun*. 2011; 79(5):1927–35. <https://doi.org/10.1128/IAI.00046-11> PMID: 21402769
32. Li M, Diep BA, Villaruz AE, Braughton KR, Jiang X, DeLeo FR, et al. Evolution of virulence in epidemic community-associated methicillin-resistant *Staphylococcus aureus*. *Proc Natl Acad Sci U S A*. 2009; 106(14):5883–8. <https://doi.org/10.1073/pnas.0900743106> PMID: 19293374
33. Noll KE, Ferris MT, Heise MT. The Collaborative Cross: A Systems Genetics Resource for Studying Host-Pathogen Interactions. *Cell Host Microbe*. 2019; 25(4):484–98. <https://doi.org/10.1016/j.chom.2019.03.009> PMID: 30974083
34. Threadgill DW, Miller DR, Churchill GA, de Villena FP. The collaborative cross: a recombinant inbred mouse population for the systems genetic era. *Ilar j*. 2011; 52(1):24–31. <https://doi.org/10.1093/ilar.52.1.24> PMID: 21411855
35. Churchill GA, Airey DC, Allayee H, Angel JM, Attie AD, Beatty J, et al. The Collaborative Cross, a community resource for the genetic analysis of complex traits. *Nature genetics*. 2004; 36(11):1133. <https://doi.org/10.1038/ng1104-1133> PMID: 15514660
36. Srivastava A, Morgan AP, Najarian ML, Sarsani VK, Sigmon JS, Shorter JR, et al. Genomes of the Mouse Collaborative Cross. *Genetics*. 2017; 206(2):537–56. <https://doi.org/10.1534/genetics.116.198838> PMID: 28592495
37. Shorter JR, Najarian ML, Bell TA, Blanchard M, Ferris MT, Hock P, et al. Whole Genome Sequencing and Progress Toward Full Inbreeding of the Mouse Collaborative Cross Population. *G3 Genes|Genomes|Genetics*. 2019; 9(5):1303–11. <https://doi.org/10.1534/g3.119.400039> PMID: 30858237
38. Rasmussen AL, Okumura A, Ferris MT, Green R, Feldmann F, Kelly SM, et al. Host genetic diversity enables Ebola hemorrhagic fever pathogenesis and resistance. *Science*. 2014; 346(6212):987–91. <https://doi.org/10.1126/science.1259595> PMID: 25359852
39. Graham JB, Thomas S, Swarts J, McMillan AA, Ferris MT, Suthar MS, et al. Genetic diversity in the collaborative cross model recapitulates human West Nile virus disease outcomes. *MBio*. 2015; 6(3).
40. Ferris MT, Aylor DL, Bottomly D, Whitmore AC, Aicher LD, Bell TA, et al. Modeling host genetic regulation of influenza pathogenesis in the collaborative cross. *PLoS Pathog*. 2013; 9(2):e1003196. <https://doi.org/10.1371/journal.ppat.1003196> PMID: 23468633
41. Xiong H, Morrison J, Ferris MT, Gralinski LE, Whitmore AC, Green R, et al. Genomic profiling of collaborative cross founder mice infected with respiratory viruses reveals novel transcripts and infection-related strain-specific gene and isoform expression. *G3 (Bethesda)*. 2014; 4(8):1429–44. <https://doi.org/10.1534/g3.114.011759> PMID: 24902603
42. Graham JB, Swarts JL, Leist SR, Schäfer A, Menachery VD, Gralinski LE, et al. Baseline T cell immune phenotypes predict virologic and disease control upon SARS-CoV infection in Collaborative Cross mice. *PLoS Pathog*. 2021; 17(1):e1009287. <https://doi.org/10.1371/journal.ppat.1009287> PMID: 33513210
43. Brinkmeyer-Langford CL, Rech R, Amstalden K, Kochan KJ, Hillhouse AE, Young C, et al. Host genetic background influences diverse neurological responses to viral infection in mice. *Sci Rep*. 2017; 7(1):12194. <https://doi.org/10.1038/s41598-017-12477-2> PMID: 28939838
44. Jensen IJ, Martin MD, Tripathy SK, Badovinac VP. Novel Mouse Model of Murine Cytomegalovirus-Induced Adaptive NK Cells. *Immunohorizons*. 2022; 6(1):8–15. <https://doi.org/10.4049/immunohorizons.2100113> PMID: 35031582

45. Cartwright HN, Barbeau DJ, Doyle JD, Klein E, Heise MT, Ferris MT, et al. Genetic diversity of collaborative cross mice enables identification of novel rift valley fever virus encephalitis model. *PLoS Pathog.* 2022; 18(7):e1010649. <https://doi.org/10.1371/journal.ppat.1010649> PMID: 35834486
46. Smith CM, Proulx MK, Olive AJ, Laddy D, Mishra BB, Moss C, et al. Tuberculosis Susceptibility and Vaccine Protection Are Independently Controlled by Host Genotype. *mBio.* 2016; 7(5). <https://doi.org/10.1128/mBio.01516-16> PMID: 27651361
47. Smith CM, Baker RE, Proulx MK, Mishra BB, Long JE, Park SW, et al. Host-pathogen genetic interactions underlie tuberculosis susceptibility in genetically diverse mice. *Elife.* 2022;11. <https://doi.org/10.7554/eLife.74419> PMID: 35112666
48. Vered K, Durrant C, Mott R, Iraqi FA. Susceptibility to *Klebsiella pneumoniae* infection in collaborative cross mice is a complex trait controlled by at least three loci acting at different time points. *BMC Genomics.* 2014; 15:865. <https://doi.org/10.1186/1471-2164-15-865> PMID: 25283706
49. Loré NI, Iraqi FA, Bragonzi A. Host genetic diversity influences the severity of *Pseudomonas aeruginosa* pneumonia in the Collaborative Cross mice. *BMC Genet.* 2015; 16:106. <https://doi.org/10.1186/s12863-015-0260-6> PMID: 26310945
50. Rogovskyy AS, Rogovska YV, Taylor BM, Wiener DJ, Threadgill DW. The First Immunocompetent Mouse Model of Strictly Human Pathogen, *Borrelia recurrentis*. *Infect Immun.* 2021; 89(7):e0004821. <https://doi.org/10.1128/IAI.00048-21> PMID: 33875475
51. Scoggin K, Lynch R, Gupta J, Nagarajan A, Sheffield M, Elsaadi A, et al. Genetic background influences survival of infections with *Salmonella enterica* serovar Typhimurium in the Collaborative Cross. *PLoS Genet.* 2022; 18(4):e1010075. <https://doi.org/10.1371/journal.pgen.1010075> PMID: 35417454
52. Scoggin K, Gupta J, Lynch R, Nagarajan A, Aminian M, Peterson A, et al. Elucidating Mechanisms of Tolerance to *Salmonella* Typhimurium across Long-Term Infections Using the Collaborative Cross. *mBio.* 2022; 13(4):e0112022. <https://doi.org/10.1128/mbio.01120-22> PMID: 35880881
53. Alugupalli KR, Kothari S, Cravens MP, Walker JA, Dougharty DT, Dickinson GS, et al. Identification of collaborative cross mouse strains permissive to *Salmonella enterica* serovar Typhi infection. *Sci Rep.* 2023; 13(1):393. <https://doi.org/10.1038/s41598-023-27400-1> PMID: 36624251
54. Zhang J, Malo D, Mott R, Panthier J-J, Montagutelli X, Jaubert J. Identification of new loci involved in the host susceptibility to *Salmonella* Typhimurium in collaborative cross mice. *BMC Genomics.* 2018; 19(1):303. <https://doi.org/10.1186/s12864-018-4667-0> PMID: 29703142
55. Ayres JS, Schneider DS. Tolerance of infections. *Annu Rev Immunol.* 2012; 30:271–94. <https://doi.org/10.1146/annurev-immunol-020711-075030> PMID: 22224770
56. McCarville J, Ayres J. Disease tolerance: concept and mechanisms. *Current opinion in immunology.* 2018; 50:88–93. <https://doi.org/10.1016/j.coi.2017.12.003> PMID: 29253642
57. Schneider DS, Ayres JS. Two ways to survive infection: what resistance and tolerance can teach us about treating infectious diseases. *Nat Rev Immunol.* 2008; 8(11):889–95. <https://doi.org/10.1038/nri2432> PMID: 18927577
58. Ngcobo S, Molatlhegi RP, Osman F, Ngcapu S, Samsunder N, Garrett NJ, et al. Pre-infection plasma cytokines and chemokines as predictors of HIV disease progression. *Sci Rep.* 2022; 12(1):2437. <https://doi.org/10.1038/s41598-022-06532-w> PMID: 35165387
59. Broman KW, Gatti DM, Simecek P, Furlotte NA, Prins P, Sen S, et al. R/qt12: Software for Mapping Quantitative Trait Loci with High-Dimensional Data and Multiparent Populations. *Genetics.* 2019; 211(2):495–502. <https://doi.org/10.1534/genetics.118.301595> PMID: 30591514
60. Vincent M, Gerdes Gyuricza I, Keele GR, Gatti DM, Keller MP, Broman KW, et al. QTLViewer: an interactive webtool for genetic analysis in the Collaborative Cross and Diversity Outbred mouse populations. *G3 Genes|Genomes|Genetics.* 2022; 12(8). <https://doi.org/10.1093/g3journal/jkac146> PMID: 35703938
61. Keele GR, Crouse WL, Kelada SNP, Valdar W. Determinants of QTL Mapping Power in the Realized Collaborative Cross. *G3 Genes|Genomes|Genetics.* 2019; 9(5):1707–27. <https://doi.org/10.1534/g3.119.400194> PMID: 30914424
62. Blake JA, Baldarelli R, Kadin JA, Richardson JE, Smith CL, Bult CJ. Mouse Genome Database (MGD): Knowledgebase for mouse-human comparative biology. *Nucleic Acids Res.* 2021; 49(D1):D981–d7. <https://doi.org/10.1093/nar/gkaa1083> PMID: 33231642
63. Praggastis M, Tortelli B, Zhang J, Fujiwara H, Sidhu R, Chacko A, et al. A Murine Niemann-Pick C1 I1061T Knock-In Model Recapitulates the Pathological Features of the Most Prevalent Human Disease Allele. 2015; 35(21):8091–106. <https://doi.org/10.1523/JNEUROSCI.4173-14.2015> PMID: 26019327

64. Platt N, Speak AO, Colaco A, Gray J, Smith DA, Williams IM, et al. Immune dysfunction in Niemann-Pick disease type C. *Journal of neurochemistry*. 2016; 136 Suppl 1(Suppl Suppl 1):74–80. <https://doi.org/10.1111/jnc.13138> PMID: 25946402
65. Busse DC, Habgood-Coote D, Clare S, Brandt C, Bassano I, Kaforou M, et al. Interferon-Induced Protein 44 and Interferon-Induced Protein 44-Like Restrict Replication of Respiratory Syncytial Virus. *J Virol*. 2020; 94(18). <https://doi.org/10.1128/JVI.00297-20> PMID: 32611756
66. Dias SP, Brouwer MC, van de Beek D. Sex and Gender Differences in Bacterial Infections. *Infect Immun*. 2022; 90(10):e0028322. <https://doi.org/10.1128/iai.00283-22> PMID: 36121220
67. Fish EN. The X-files in immunity: sex-based differences predispose immune responses. *Nat Rev Immunol*. 2008; 8(9):737–44. <https://doi.org/10.1038/nri2394> PMID: 18728636
68. Harbarth S, Sax H, Fankhauser-Rodriguez C, Schrenzel J, Agostinho A, Pittet D. Evaluating the probability of previously unknown carriage of MRSA at hospital admission. *The American journal of medicine*. 2006; 119(3):275. e15–.e23. <https://doi.org/10.1016/j.amjmed.2005.04.042> PMID: 16490475
69. Laupland KB, Lyytikäinen O, Sgaard M, Kennedy K, Knudsen JD, Ostergaard C, et al. The changing epidemiology of *Staphylococcus aureus* bloodstream infection: a multinational population-based surveillance study. *Clinical microbiology and infection*. 2013; 19(5):465–71. <https://doi.org/10.1111/j.1469-0691.2012.03903.x> PMID: 22616816
70. Kaasch AJ, Barlow G, Edgeworth JD, Fowler VG Jr, Hellmich M, Hopkins S, et al. *Staphylococcus aureus* bloodstream infection: a pooled analysis of five prospective, observational studies. *Journal of Infection*. 2014; 68(3):242–51. <https://doi.org/10.1016/j.jinf.2013.10.015> PMID: 24247070
71. Maclayton DO, Suda KJ, Coval KA, York CB, Garey KW. Case-control study of the relationship between MRSA bacteremia with a vancomycin MIC of 2 µg/mL and risk factors, costs, and outcomes in inpatients undergoing hemodialysis. *Clinical therapeutics*. 2006; 28(8):1208–16.
72. Mansur N, Hazzan R, Paul M, Bishara J, Leibovici L. Does sex affect 30-day mortality in *Staphylococcus aureus* bacteremia? *Gender medicine*. 2012; 9(6):463–70. <https://doi.org/10.1016/j.genm.2012.10.009> PMID: 23141419
73. Smit J, López-Cortés LE, Kaasch AJ, Sogaard M, Thomsen RW, Schönheyder HC, et al. Gender differences in the outcome of community-acquired *Staphylococcus aureus* bacteraemia: a historical population-based cohort study. *Clinical Microbiology and Infection*. 2017; 23(1):27–32. <https://doi.org/10.1016/j.cmi.2016.06.002> PMID: 27343816
74. Paulsen J, Mehl A, Askim A, Solligård E, Åsvold BO, Damås JK. Epidemiology and outcome of *Staphylococcus aureus* bloodstream infection and sepsis in a Norwegian county 1996–2011: an observational study. *BMC infectious diseases*. 2015; 15(1):1–10.
75. Kubica M, Guzik K, Koziel J, Zarebski M, Richter W, Gajkowska B, et al. A potential new pathway for *Staphylococcus aureus* dissemination: the silent survival of *S. aureus* phagocytosed by human monocyte-derived macrophages. *PloS one*. 2008; 3(1):e1409. <https://doi.org/10.1371/journal.pone.0001409> PMID: 18183290
76. Pidwill GR, Gibson JF, Cole J, Renshaw SA, Foster SJ. The Role of Macrophages in *Staphylococcus aureus* Infection. *Front Immunol*. 2020; 11:620339. <https://doi.org/10.3389/fimmu.2020.620339> PMID: 33542723
77. Skaar EP, Humayun M, Bae T, DeBord KL, Schneewind O. Iron-source preference of *Staphylococcus aureus* infections. *Science*. 2004; 305(5690):1626–8. <https://doi.org/10.1126/science.1099930> PMID: 15361626
78. Croize J, Gialanella P, Monnet D, Okada J, Orsi A, Voss A, et al. Improved identification of *Staphylococcus aureus* using a new agglutination test. Results of an international study. *Apms*. 1993; 101(6):487–91. PMID: 8363825
79. Wilkerson M, McAllister S, Miller JM, Heiter BJ, Bourbeau PP. Comparison of five agglutination tests for identification of *Staphylococcus aureus*. *J Clin Microbiol*. 1997; 35(1):148–51. <https://doi.org/10.1128/jcm.35.1.148-151.1997> PMID: 8968897
80. Shin PK, Pawar P, Konstantopoulos K, Ross JM. Characteristics of new *Staphylococcus aureus*-RBC adhesion mechanism independent of fibrinogen and IgG under hydrodynamic shear conditions. *Am J Physiol Cell Physiol*. 2005; 289(3):C727–34. <https://doi.org/10.1152/ajpcell.00034.2005> PMID: 15888554
81. Gianquinto E, Moscetti I, De Bei O, Campanini B, Marchetti M, Luque FJ, et al. Interaction of human hemoglobin and semi-hemoglobins with the *Staphylococcus aureus* hemophore IsdB: a kinetic and mechanistic insight. *Scientific Reports*. 2019; 9(1):18629. <https://doi.org/10.1038/s41598-019-54970-w> PMID: 31819099
82. Spaan AN, Reyes-Robles T, Badiou C, Cochet S, Boguslawski KM, Yoong P, et al. *Staphylococcus aureus* Targets the Duffy Antigen Receptor for Chemokines (DARC) to Lyse Erythrocytes. *Cell Host Microbe*. 2015; 18(3):363–70. <https://doi.org/10.1016/j.chom.2015.08.001> PMID: 26320997



83. Spaan AN, Surewaard BG, Nijland R, van Strijp JA. Neutrophils versus *Staphylococcus aureus*: a biological tug of war. *Annu Rev Microbiol*. 2013; 67:629–50. <https://doi.org/10.1146/annurev-micro-092412-155746> PMID: 23834243
84. Bouma G, Ancliff PJ, Thrasher AJ, Burns SO. Recent advances in the understanding of genetic defects of neutrophil number and function. *Br J Haematol*. 2010; 151(4):312–26. <https://doi.org/10.1111/j.1365-2141.2010.08361.x> PMID: 20813010
85. Andrews T, Sullivan KE. Infections in patients with inherited defects in phagocytic function. *Clin Microbiol Rev*. 2003; 16(4):597–621. <https://doi.org/10.1128/CMR.16.4.597-621.2003> PMID: 14557288
86. Lakshman R, Finn A. Neutrophil disorders and their management. *J Clin Pathol*. 2001; 54(1):7–19. <https://doi.org/10.1136/jcp.54.1.7> PMID: 11271792
87. Pfeffer SR. NPC intracellular cholesterol transporter 1 (NPC1)-mediated cholesterol export from lysosomes. *J Biol Chem*. 2019; 294(5):1706–9. <https://doi.org/10.1074/jbc.TM118.004165> PMID: 30710017
88. Pentchev PG. Niemann–Pick C research from mouse to gene. *Biochimica et Biophysica Acta (BBA)—Molecular and Cell Biology of Lipids*. 2004; 1685(1):3–7. <https://doi.org/10.1016/j.bbalip.2004.08.005> PMID: 15465420
89. Hendriks T, Walenbergh SM, Hofker MH, Shiri-Sverdlov R. Lysosomal cholesterol accumulation: driver on the road to inflammation during atherosclerosis and non-alcoholic steatohepatitis. *Obes Rev*. 2014; 15(5):424–33. <https://doi.org/10.1111/obr.12159> PMID: 24629059
90. Xu X, Yuan X, Li N, Dewey WL, Li PL, Zhang F. Lysosomal cholesterol accumulation in macrophages leading to coronary atherosclerosis in CD38(-/-) mice. *J Cell Mol Med*. 2016; 20(6):1001–13. <https://doi.org/10.1111/jcmm.12788> PMID: 26818887
91. Carette JE, Raaben M, Wong AC, Herbert AS, Obernosterer G, Mulherkar N, et al. Ebola virus entry requires the cholesterol transporter Niemann–Pick C1. *Nature*. 2011; 477(7364):340–3. <https://doi.org/10.1038/nature10348> PMID: 21866103
92. Morales-Tenorio M, Ginex T, Cuesta-Geijo MÁ, Campillo NE, Muñoz-Fontela C, Alonso C, et al. Potential pharmacological strategies targeting the Niemann-Pick C1 receptor and Ebola virus glycoprotein interaction. *European Journal of Medicinal Chemistry*. 2021; 223:113654. <https://doi.org/10.1016/j.ejmech.2021.113654> PMID: 34175537
93. Houben T, Penders J, Oligschläger Y, Dos Reis IAM, Bonder MJ, Koonen DP, et al. Hematopoietic Npc1 mutation shifts gut microbiota composition in Ldlr(-/-) mice on a high-fat, high-cholesterol diet. *Sci Rep*. 2019; 9(1):14956. <https://doi.org/10.1038/s41598-019-51525-x> PMID: 31628414
94. Schwerdt T, Pandey S, Yang HT, Bagola K, Jameson E, Jung J, et al. Impaired antibacterial autophagy links granulomatous intestinal inflammation in Niemann-Pick disease type C1 and XIAP deficiency with NOD2 variants in Crohn's disease. *Gut*. 2017; 66(6):1060–73. <https://doi.org/10.1136/gutjnl-2015-310382> PMID: 26953272
95. Prajsnar TK, Serba JJ, Dekker BM, Gibson JF, Masud S, Fleming A, et al. The autophagic response to *Staphylococcus aureus* provides an intracellular niche in neutrophils. *Autophagy*. 2021; 17(4):888–902. <https://doi.org/10.1080/15548627.2020.1739443> PMID: 32174246
96. Dai Y, Gao C, Chen L, Chang W, Yu W, Ma X, et al. Heterogeneous Vancomycin-Intermediate *Staphylococcus aureus* Uses the VraSR Regulatory System to Modulate Autophagy for Increased Intracellular Survival in Macrophage-Like Cell Line RAW264.7. *Front Microbiol*. 2019; 10:1222. <https://doi.org/10.3389/fmicb.2019.01222> PMID: 31214151
97. O'Keefe KM, Wilk MM, Leech JM, Murphy AG, Laabei M, Monk IR, et al. Manipulation of Autophagy in Phagocytes Facilitates *Staphylococcus aureus* Bloodstream Infection. *Infect Immun*. 2015; 83(9):3445–57. <https://doi.org/10.1128/IAI.00358-15> PMID: 26099586
98. Jiang H, Tsang L, Wang H, Liu C. IFI44L as a Forward Regulator Enhancing Host Antituberculosis Responses. *J Immunol Res*. 2021; 2021:5599408. <https://doi.org/10.1155/2021/5599408> PMID: 34722780
99. DeDiego ML, Martinez-Sobrido L, Topham DJ. Novel Functions of IFI44L as a Feedback Regulator of Host Antiviral Responses. *J Virol*. 2019; 93(21). <https://doi.org/10.1128/JVI.01159-19> PMID: 31434731
100. Holden MT, Feil EJ, Lindsay JA, Peacock SJ, Day NP, Enright MC, et al. Complete genomes of two clinical *Staphylococcus aureus* strains: evidence for the rapid evolution of virulence and drug resistance. *Proc Natl Acad Sci U S A*. 2004; 101(26):9786–91. <https://doi.org/10.1073/pnas.0402521101> PMID: 15213324
101. Highlander SK, Hultén KG, Qin X, Jiang H, Yerrapragada S, Mason EO Jr., et al. Subtle genetic changes enhance virulence of methicillin resistant and sensitive *Staphylococcus aureus*. *BMC Microbiol*. 2007; 7:99. <https://doi.org/10.1186/1471-2180-7-99> PMID: 17986343

102. Lee HS, Song HS, Lee HJ, Kim SH, Suh MJ, Cho JY, et al. Comparative Study of the Difference in Behavior of the Accessory Gene Regulator (Agr) in USA300 and USA400 Community-Associated Methicillin-Resistant *Staphylococcus aureus* (CA-MRSA). *J Microbiol Biotechnol*. 2021; 31(8):1060–8. <https://doi.org/10.4014/jmb.2104.04032> PMID: 34226408
103. Jones MB, Montgomery CP, Boyle-Vavra S, Shatzkes K, Maybank R, Frank BC, et al. Genomic and transcriptomic differences in community acquired methicillin resistant *Staphylococcus aureus* USA300 and USA400 strains. *BMC Genomics*. 2014; 15:1145. <https://doi.org/10.1186/1471-2164-15-1145> PMID: 25527145
104. Bor DH, Woolhandler S, Nardin R, Bruschi J, Himmelstein DU. Infective Endocarditis in the U.S., 1998–2009: A Nationwide Study. *PLOS ONE*. 2013; 8(3):e60033. <https://doi.org/10.1371/journal.pone.0060033> PMID: 23527296
105. Federspiel JJ, Stearns SC, Peppercorn AF, Chu VH, Fowler VG. Increasing US rates of endocarditis with *Staphylococcus aureus*: 1999–2008. *Archives of internal medicine*. 2012; 172(4):363–5. <https://doi.org/10.1001/archinternmed.2011.1027> PMID: 22371926
106. Gibson GW, Kreuser SC, Riley JM, Rosebury-Smith WS, Courtney CL, Juneau PL, et al. Development of a mouse model of induced *Staphylococcus aureus* infective endocarditis. *Comparative medicine*. 2007; 57(6):563–9. PMID: 18246868
107. Liesenborghs L, Meyers S, Lox M, Criel M, Claes J, Peetermans M, et al. *Staphylococcus aureus* endocarditis: distinct mechanisms of bacterial adhesion to damaged and inflamed heart valves. *Eur Heart J*. 2019; 40(39):3248–59. <https://doi.org/10.1093/eurheartj/ehz175> PMID: 30945735
108. Wasi F, Shuter J. Primary bacterial infection of the myocardium. *Front Biosci*. 2003; 8:s228–31. <https://doi.org/10.2741/1021> PMID: 12700039
109. LeLeiko RM, Bower DJ, Larsen CP. MRSA-associated bacterial myocarditis causing ruptured ventricle and tamponade. *Cardiology*. 2008; 111(3):188–90. <https://doi.org/10.1159/000121602> PMID: 18434723
110. Jariwala P, Punjani A, Mirza S, Harikishan B, Madhwar DB. Myocardial abscess secondary to staphylococcal septicemia: diagnosis with 3D echocardiography. *Indian Heart J*. 2013; 65(1):124–5. <https://doi.org/10.1016/j.ihj.2012.12.005> PMID: 23438629
111. Lee L-N, Chou W-R, Wang J-Y, Kuo Y-L, Chang C-Y, Lee Y-C, et al. Characteristics and local risk factors of community-acquired and health-care-associated *Staphylococcus aureus* pneumonia. *Scientific Reports*. 2022; 12(1):18670. <https://doi.org/10.1038/s41598-022-23246-1> PMID: 36333461
112. Redi D, Raffaelli CS, Rossetti B, De Luca A, Montagnani F. *Staphylococcus aureus* vaccine preclinical and clinical development: current state of the art. *New Microbiol*. 2018; 41(3):208–13. PMID: 29874390
113. Miller LS, Fowler VG, Shukla SK, Rose WE, Proctor RA. Development of a vaccine against *Staphylococcus aureus* invasive infections: Evidence based on human immunity, genetics and bacterial evasion mechanisms. *FEMS Microbiol Rev*. 2020; 44(1):123–53. <https://doi.org/10.1093/femsre/fuz030> PMID: 31841134
114. Collin R, Balmer L, Morahan G, Lesage S. Common Heritable Immunological Variations Revealed in Genetically Diverse Inbred Mouse Strains of the Collaborative Cross. *The Journal of Immunology*. 2019; 202(3):777–86. <https://doi.org/10.4049/jimmunol.1801247> PMID: 30587532
115. Visscher PM, Hill WG, Wray NR. Heritability in the genomics era—concepts and misconceptions. *Nat Rev Genet*. 2008; 9(4):255–66. <https://doi.org/10.1038/nrg2322> PMID: 18319743
116. Nagarajan A, Scoggin K, Gupta J, Threadgill DW, Andrews-Polymenis HL. Using the collaborative cross to identify the role of host genetics in defining the murine gut microbiome. *Microbiome*. 2023; 11(1):149. <https://doi.org/10.1186/s40168-023-01552-8> PMID: 37420306
117. Churchill GA, Doerge RW. Empirical threshold values for quantitative trait mapping. *Genetics*. 1994; 138(3):963–71. <https://doi.org/10.1093/genetics/138.3.963> PMID: 7851788
118. Bogue MA, Ball RL, Philip VM, Walton DO, Dunn MH, Kolishovski G, et al. Mouse Phenome Database: towards a more FAIR-compliant and TRUST-worthy data repository and tool suite for phenotypes and genotypes. *Nucleic Acids Res*. 2023; 51(D1):D1067–d74. <https://doi.org/10.1093/nar/gkac1007> PMID: 36330959
119. Cunningham F, Allen JE, Allen J, Alvarez-Jarreta J, Amode MR, Armean IM, et al. Ensembl2022. *Nucleic Acids Res*. 2022; 50(D1):D988–d95. <https://doi.org/10.1093/nar/gkab1049> PMID: 34791404
120. Krueger F. Taking appropriate QC measures for RRBS-type or other -Seq applications with Trim Galore! Github. 2019.
121. Kechin A, Boyarskikh U, Kel A, Filipenko M. cutPrimers: A New Tool for Accurate Cutting of Primers from Reads of Targeted Next Generation Sequencing. *J Comput Biol*. 2017; 24(11):1138–43. <https://doi.org/10.1089/cmb.2017.0096> PMID: 28715235

122. Andrews S. FastQC: a quality control tool for high throughput sequence data. Babraham Bioinformatics, Babraham Institute, Cambridge, United Kingdom; 2010.
123. Dobin A, Davis CA, Schlesinger F, Drenkow J, Zaleski C, Jha S, et al. STAR: ultrafast universal RNA-seq aligner. *Bioinformatics*. 2013; 29(1):15–21. <https://doi.org/10.1093/bioinformatics/bts635> PMID: 23104886
124. Ge SX, Son EW, Yao R. iDEP: an integrated web application for differential expression and pathway analysis of RNA-Seq data. *BMC Bioinformatics*. 2018; 19(1):534. <https://doi.org/10.1186/s12859-018-2486-6> PMID: 30567491
125. Ge X. iDEP Web Application for RNA-Seq Data Analysis. *Methods Mol Biol*. 2021; 2284:417–43. [https://doi.org/10.1007/978-1-0716-1307-8\\_22](https://doi.org/10.1007/978-1-0716-1307-8_22) PMID: 33835455
126. Love MI, Huber W, Anders S. Moderated estimation of fold change and dispersion for RNA-seq data with DESeq2. *Genome Biol*. 2014; 15(12):550. <https://doi.org/10.1186/s13059-014-0550-8> PMID: 25516281
